# Supplementary material for: A corundum reference material for oxygen isotope analysis by secondary ionization mass spectrometry
Source: Royal Society of Chemistry journal article supplement (doi:10.1039/d3ja00229b), 2023-12-07
Supplement: d3ja00229b1.xlsx [file d3ja00229b1.xlsx]

## Sheet: Part A
Supplementary Table 1 Part A: δ18O SIMS results for 6 mm slice of HD-LR1.
File	Time	Remarks	δ18O (‰)	δ18O (‰)	1SE (int.) (‰)	X	Y	Ip (nA)	16O (cps)	1SE (%)
			measured	normalized to bulk
δ18O homogeneity test (Fig. 3A, Tab. 2B)
LaserRuby_wedge@1.asc	15:13:00	profile	13.6046	18.6158	0.174567	-461	1196	1.54125	8.03673e+08	0.044731
LaserRuby_wedge@02.asc	15:16:00	profile	13.5538	18.5654	0.116352	-360	1196	1.54248	8.01302e+08	0.0441221
LaserRuby_wedge@03.asc	15:19:00	profile	13.5078	18.5191	0.119136	-360	896	1.54234	7.99792e+08	0.0553458
LaserRuby_wedge@04.asc	15:22:00	profile	13.4523	18.4626	0.117307	-450	901	1.54064	8.0522e+08	0.0530289
LaserRuby_wedge@05.asc	15:25:00	profile	13.3042	18.3135	0.11135	-450	601	1.54008	8.06237e+08	0.061712
LaserRuby_wedge@06.asc	15:28:00	profile	13.372	18.3823	0.106921	-354	597	1.54147	8.06053e+08	0.0438146
LaserRuby_wedge@07.asc	15:31:00	profile	13.3153	18.3253	0.113023	-326	298	1.54143	8.01478e+08	0.040048
LaserRuby_wedge@08.asc	15:34:00	profile	13.4023	18.4128	0.135094	-427	296	1.54166	8.01063e+08	0.0360842
LaserRuby_wedge@09.asc	15:37:00	profile	13.3019	18.3112	0.109529	-427	-4	1.54027	8.03351e+08	0.0333456
LaserRuby_wedge@10.asc	15:40:00	profile	13.3088	18.316	0.11258	-320	-10	1.53603	7.97571e+08	0.038242
LaserRuby_wedge@11.asc	15:42:00	profile	13.5749	18.5812	0.125395	-392	-302	1.53167	8.0032e+08	0.0285596
LaserRuby_wedge@12.asc	15:45:00	profile	13.3772	18.3803	0.159105	-483	-302	1.52735	7.9544e+08	0.0422075
LaserRuby_wedge@13.asc	15:48:00	profile	13.305	18.3051	0.118017	-483	-602	1.52191	7.91147e+08	0.0259733
LaserRuby_wedge@14.asc	15:51:00	profile	13.0284	18.0229	0.134117	-414	-603	1.51346	7.84907e+08	0.0388441
LaserRuby_wedge@15.asc	15:54:00	profile	13.3803	18.3726	0.159561	-414	-903	1.5058	7.89969e+08	0.043918
LaserRuby_wedge@16.asc	15:57:00	profile	13.4586	18.4489	0.100438	-510	-903	1.50114	7.84403e+08	0.0443227
LaserRuby_wedge@17.asc	16:00:00	profile	13.347	18.3341	0.108696	-510	-1203	1.49604	7.89551e+08	0.0339039
LaserRuby_wedge@18.asc	16:03:00	profile	13.4142	18.4006	0.153156	-374	-1204	1.49404	7.76276e+08	0.0293948
LaserRuby_wedge@19.asc	16:06:00	profile	13.5101	18.4922	0.117976	-374	-1504	1.48454	7.7799e+08	0.030655
LaserRuby_wedge@20.asc	16:09:00	profile	13.4481	18.4277	0.196816	-470	-1509	1.48026	7.74054e+08	0.0300079
LaserRuby_wedge@21.asc	16:12:00	profile	13.4485	18.4241	0.107077	-470	-1809	1.47223	7.70318e+08	0.0302367
LaserRuby_wedge@22.asc	16:15:00	profile	13.4576	18.429	0.0776177	-350	-1808	1.46385	7.64872e+08	0.013355
LaserRuby_wedge@23.asc	16:18:00	profile	13.6608	18.6251	0.111757	-350	-2108	1.44789	7.46396e+08	0.103093
LaserRuby_wedge@24.asc	16:21:00	profile	13.3098	18.2456	0.125039	-463	-2103	1.39472	7.00308e+08	0.127631
LaserRuby_wedge@25.asc	16:24:00	profile	13.3381	18.2352	0.153948	-463	-2403	1.31812	6.70289e+08	0.0909134
LaserRuby_wedge@26.asc	16:27:00	profile	13.3891	18.2583	0.120611	-348	-2403	1.26232	6.45955e+08	0.051348
LaserRuby_wedge@27.asc	16:29:00	profile	13.4476	18.298	0.125849	-348	-2703	1.22465	6.31439e+08	0.0293297
LaserRuby_wedge@28.asc	16:32:00	profile	13.4912	18.3292	0.113129	-517	-2700	1.19964	6.23755e+08	0.0187655
LaserRuby_wedge@29.asc	16:35:00	profile	13.2666	18.0941	0.195499	-517	-3000	1.18117	6.13594e+08	0.00768583
LaserRuby_wedge@30.asc	16:38:00	profile	13.4376	18.2577	0.131687	-425	-2999	1.16487	6.10192e+08	0.0301647
LaserRuby_wedge@31.asc	16:41:00	profile	13.4666	18.284	0.172509	-425	-3299	1.15916	6.05392e+08	0.0217101
LaserRuby_wedge@32.asc	16:44:00	profile	13.8178	18.6328	0.150825	-525	-3298	1.15113	6.02672e+08	0.0281204
LaserRuby_wedge@33.asc	16:47:00	profile	13.5508	18.3628	0.167878	-525	-3598	1.14767	6.01545e+08	0.0284953
LaserRuby_wedge@34.asc	16:50:00	profile	13.7384	18.5491	0.220594	-411	-3593	1.14324	5.97104e+08	0.0280121
LaserRuby_wedge@35.asc	16:53:00	profile	13.6434	18.4512	0.157421	-411	-3893	1.13855	5.94833e+08	0.0232926
LaserRuby_wedge@36.asc	16:56:00	profile	13.6634	18.4691	0.165871	-519	-3892	1.13416	5.95301e+08	0.0394289
LaserRuby_wedge@37.asc	16:59:00	profile	13.7129	18.5164	0.202651	-519	-4192	1.12946	5.95722e+08	0.0345242
LaserRuby_wedge@38.asc	17:02:00	profile	13.7333	18.535	0.147349	-398	-4192	1.12574	5.94996e+08	0.0243249
LaserRuby_wedge@39.asc	17:10:00	profile	13.6569	18.5239	0.105407	-459	-4184	1.2556	6.67125e+08	0.0740978
LaserRuby_wedge@40.asc	17:13:00	profile	13.4632	18.3338	0.185797	-602	-4185	1.26457	6.71732e+08	0.0719334
LaserRuby_wedge@41.asc	17:16:00	profile	13.6816	18.5586	0.133503	-602	-3885	1.27505	6.72634e+08	0.0565878
LaserRuby_wedge@42.asc	17:19:00	profile	13.5463	18.4233	0.122924	-468	-3887	1.27621	6.75218e+08	0.0409662
LaserRuby_wedge@43.asc	17:22:00	profile	13.7442	18.6222	0.145956	-468	-3587	1.27636	6.75744e+08	0.0471642
LaserRuby_wedge@44.asc	17:25:00	profile	13.4444	18.3219	0.1516	-604	-3587	1.27828	6.76008e+08	0.0468608
LaserRuby_wedge@45.asc	17:28:00	profile	13.6767	18.5558	0.1765	-604	-3287	1.27936	6.76614e+08	0.0435051
LaserRuby_wedge@46.asc	17:31:00	profile	13.5193	18.3975	0.174457	-486	-3293	1.27888	6.75654e+08	0.0315375
LaserRuby_wedge@47.asc	17:34:00	profile	13.3613	18.2393	0.144707	-371	-2993	1.28	6.73657e+08	0.0349453
LaserRuby_wedge@48.asc	17:37:00	profile	13.3211	18.1988	0.148056	-603	-2994	1.27993	6.73266e+08	0.0507959
LaserRuby_wedge@49.asc	17:40:00	profile	13.5546	18.4342	0.134763	-603	-2694	1.28132	6.7509e+08	0.0430205
LaserRuby_wedge@50.asc	17:43:00	profile	13.3801	18.2579	0.116492	-417	-2695	1.27951	6.73155e+08	0.0480342
LaserRuby_wedge@51.asc	17:46:00	profile	13.5491	18.4259	0.16499	-417	-2395	1.27591	6.69104e+08	0.679446
LaserRuby_wedge@52.asc	17:49:00	profile	13.5783	18.4558	0.156812	-529	-2392	1.27711	6.7225e+08	0.054327
LaserRuby_wedge@53.asc	17:52:00	profile	13.4865	18.3636	0.124214	-529	-2092	1.27711	6.72679e+08	0.0415888
LaserRuby_wedge@54.asc	17:55:00	profile	13.6362	18.5151	0.129254	-410	-2102	1.27907	6.73322e+08	0.0353621
LaserRuby_wedge@55.asc	17:57:00	profile	13.5377	18.4147	0.128253	-410	-1802	1.2764	6.70121e+08	0.0440785
LaserRuby_wedge@56.asc	18:00:00	profile	13.4212	18.2972	0.157744	-562	-1807	1.27554	6.72388e+08	0.0330461
LaserRuby_wedge@57.asc	18:03:00	profile	13.5947	18.4698	0.124357	-562	-1507	1.27219	6.68328e+08	0.0456295
LaserRuby_wedge@58.asc	18:06:00	profile	13.5097	18.3835	0.149648	-422	-1504	1.27024	6.6788e+08	0.0582582
LaserRuby_wedge@59.asc	18:09:00	profile	13.5589	18.4363	0.168365	-316	-1209	1.27704	6.65381e+08	0.0598857
LaserRuby_wedge@60.asc	18:12:00	profile	13.607	18.4858	0.191016	-552	-1206	1.27948	6.67577e+08	0.0605489
LaserRuby_wedge@61.asc	18:15:00	profile	13.5382	18.4173	0.140149	-552	-906	1.28038	6.66857e+08	0.0610924
LaserRuby_wedge@62.asc	18:18:00	profile	13.234	18.1121	0.151689	-351	-904	1.2815	6.69202e+08	0.0420021
LaserRuby_wedge@63.asc	18:21:00	profile	13.6578	18.5363	0.0802991	-351	-604	1.27809	6.696e+08	0.0374864
LaserRuby_wedge@64.asc	18:24:00	profile	13.3258	18.2001	0.12757	-565	-606	1.27302	6.66261e+08	0.0606679
LaserRuby_wedge@65.asc	18:27:00	profile	13.6203	18.4978	0.122588	-565	-306	1.27647	6.67207e+08	0.0359628
LaserRuby_wedge@66.asc	18:30:00	profile	13.8531	18.7296	0.126916	-434	-307	1.27234	6.68964e+08	0.0505597
LaserRuby_wedge@67.asc	18:33:00	profile	13.5947	18.4704	0.158999	-374	-9	1.27336	6.63819e+08	0.0463307
LaserRuby_wedge@68.asc	18:36:00	profile	13.6134	18.4894	0.155238	-485	-7	1.2737	6.65429e+08	0.0636105
LaserRuby_wedge@69.asc	18:39:00	profile	13.4052	18.2802	0.0863925	-511	292	1.27366	6.65836e+08	0.0454134
LaserRuby_wedge@70.asc	18:41:00	profile	13.38	18.2493	0.141291	-477	288	1.26277	6.63224e+08	0.0521059
LaserRuby_wedge@71.asc	18:44:00	profile	13.5795	18.4546	0.138493	-511	592	1.27238	6.61634e+08	0.0569566
LaserRuby_wedge@72.asc	18:47:00	profile	13.7368	18.6103	0.172963	-594	594	1.26757	6.64359e+08	0.0524825
LaserRuby_wedge@73.asc	18:50:00	profile	13.4304	18.2912	0.134697	-594	894	1.24549	6.62207e+08	0.067683
LaserRuby_wedge@74.asc	18:53:00	profile	13.4566	18.3308	0.174317	-509	891	1.27167	6.63171e+08	0.0655366
LaserRuby_wedge@75.asc	18:56:00	profile	13.3411	18.2152	0.136843	-509	1191	1.27246	6.59208e+08	0.0550987
LaserRuby_wedge@76.asc	18:59:00	profile	13.5392	18.4146	0.148094	-402	1187	1.27309	6.60903e+08	0.0649017
Topography effects (Fig. 4B)
LaserRuby_wedge@77.asc	19:05:00	top	12.7111	18.0425	0.160791	-335	1454	1.27651	6.51244e+08	0.0531637
LaserRuby_wedge@78.asc	19:08:00	top	13.9233	18.2379	0.210386	-335	1424	1.27501	6.5379e+08	0.0700743
LaserRuby_wedge@79.asc	19:10:00	top	13.2595	18.5638	0.175391	-335	1394	1.27621	6.55777e+08	0.0581143
LaserRuby_wedge@80.asc	19:13:00	top	13.4849	18.4816	0.172237	-335	1364	1.27614	6.56181e+08	0.0528296
LaserRuby_wedge@81.asc	19:16:00	top	12.9071	18.1185	0.123967	-335	1334	1.27249	6.51892e+08	0.0617933
LaserRuby_wedge@82.asc	19:19:00	top	12.8173	18.1205	0.188755	-335	1304	1.26866	6.5476e+08	0.0647252
LaserRuby_wedge@83.asc	19:22:00	top	13.5979	18.292	0.165586	-335	1274	1.26881	6.55068e+08	0.0443493
LaserRuby_wedge@84.asc	19:25:00	top	13.6976	18.4348	0.168477	-335	1244	1.26761	6.54761e+08	0.0458679
LaserRuby_wedge@85.asc	19:28:00	top	13.1057	18.2954	0.127314	-335	1214	1.26205	6.51075e+08	0.0496462
LaserRuby_wedge@86.asc	19:31:00	top	13.8114	18.3425	0.148347	-305	1184	1.26322	6.55409e+08	0.063451
LaserRuby_wedge@87.asc	19:37:00	left	14.1652	19.3159	0.138966	-1110	-1556	1.26941	6.80339e+08	0.0319681
LaserRuby_wedge@88.asc	19:40:00	left	14.0039	19.0779	0.159127	-1080	-1556	1.26757	6.79224e+08	0.0339128
LaserRuby_wedge@89.asc	19:43:00	left	13.3869	19.0584	0.147955	-1050	-1556	1.26442	6.77958e+08	0.0560682
LaserRuby_wedge@90.asc	19:46:00	left	13.9839	18.9181	0.113764	-1020	-1556	1.26619	6.77283e+08	0.0421181
LaserRuby_wedge@91.asc	19:48:00	left	14.0245	18.9673	0.127316	-990	-1556	1.26536	6.76242e+08	0.0389487
LaserRuby_wedge@92.asc	19:51:00	left	13.9834	18.8621	0.183142	-960	-1556	1.26461	6.74597e+08	0.0429983
LaserRuby_wedge@93.asc	19:54:00	left	13.3458	18.6737	0.156004	-930	-1556	1.26446	6.741e+08	0.0442327
LaserRuby_wedge@94.asc	19:57:00	left	13.9591	18.7867	0.152471	-900	-1556	1.26416	6.73806e+08	0.0525504
LaserRuby_wedge@95.asc	20:00:00	left	13.7408	18.901	0.141439	-870	-1556	1.26213	6.72472e+08	0.0409459
LaserRuby_wedge@96.asc	20:03:00	left	13.4494	18.5955	0.105941	-840	-1556	1.2622	6.71139e+08	0.035656
Corrected values normalized to a bulk value of +18.40. A primary beam drift correction was applied to the values of homogeneity test.

## Sheet: Part B
Supplementary Table 1 Part B: δ18O and δ17O SIMS results for 6 mm slice of HD-LR1.
File	Time	Remarks	X	Y	Ip (nA)	16O (cps)	1SE (%)	17O (cps)	1SE (%)	δ18O (‰)	1SE (int.) (‰)	δ17O (‰)	1SE (int.) (‰)	Δ'17O (‰)	1SE (int.) (‰)	δ18O (‰)	1SE (int.) (‰)	δ17O (‰)	1SE (int.) (‰)	Δ'17O (‰)	1SE (int.) (‰)
										measured		measured		corrected		corrected		corrected		corrected
WEK1_Lieser_K5@1.asc	13:05:00	natural corundum	1108	400	5.16	3390000000	0.06	1300000	0.06	6.85	0.05	2.88	0.15	0.0290612	0.15
WEK1_Lieser_K5@2.asc	13:09:00	natural corundum	1107	330	5.16	3380000000	0.08	1300000	0.07	6.99	0.04	2.72	0.15	-0.204257	0.15
WEK1_Kyll_K12@1.asc	13:14:00	natural corundum	694	-3726	5.14	3370000000	0.06	1290000	0.06	8.02	0.04	3.52	0.12	0.0552295	0.12
WEK1_Kyll_K12@2.asc	13:18:00	natural corundum	655	-3788	5.15	3350000000	0.06	1280000	0.06	7.88	0.04	3.42	0.17	0.0286919	0.17
WEK1_Kyll_K12@3.asc	13:22:00	natural corundum	669	-3622	5.14	3350000000	0.06	1290000	0.06	8.06	0.06	3.07	0.15	-0.415236	0.15
WEK1_Kyll_K11@1.asc	14:09:00	natural corundum	1831	-3795	5.06	3270000000	0.05	1260000	0.05	7.25	0.05	3.03	0.2	-0.0307715	0.2
WEK1_Kyll_K11@2.asc	14:12:00	natural corundum	1866	-3795	5.05	3270000000	0.05	1260000	0.05	7.19	0.05	2.89	0.15	-0.139214	0.15
WEK1_Kyll_K11@3.asc	14:16:00	natural corundum	1901	-3795	5.04	3260000000	0.07	1250000	0.06	6.95	0.04	3.01	0.12	0.106528	0.12
WEK1_Kyll_K4@1.asc	14:21:00	natural corundum	2308	-2003	5.03	3270000000	0.05	1250000	0.05	4.71	0.04	1.67	0.17	-0.0574348	0.17
WEK1_Kyll_K4@2.asc	14:25:00	natural corundum	2343	-2003	5.01	3270000000	0.07	1260000	0.07	4.97	0.06	1.93	0.17	0.0660532	0.17
WEK1_Kyll_K4@3.asc	14:28:00	natural corundum	2378	-2038	5.02	3260000000	0.07	1250000	0.07	5.18	0.04	1.96	0.14	-0.014259	0.14
WEK1_Kyll_K5@1.asc	14:32:00	natural corundum	3592	-3090	5.02	3200000000	0.07	1230000	0.08	9.48	0.05	4.04	0.14	-0.189777	0.15
WEK1_Kyll_K5@2.asc	14:36:00	natural corundum	3628	-3082	5.02	3190000000	0.06	1230000	0.06	9.28	0.05	4.17	0.16	0.0445968	0.16
WEK1_Kyll_K5@3.asc	14:42:00	natural corundum	3629	-3167	5.02	3200000000	0.05	1230000	0.05	9.57	0.04	4.42	0.15	0.142388	0.15
WEK1_Lieser_K3@1.asc	14:53:00	natural corundum	1609	1707	4.99	3200000000	0.06	1230000	0.06	6.66	0.04	2.83	0.14	0.0787402	0.14
WEK1_Lieser_K3@2.asc	14:57:00	natural corundum	1640	1677	4.98	3170000000	0.04	1220000	0.04	6.19	0.07	2.35	0.18	-0.154503	0.18
WEK1_Lieser_K3@3.asc	15:01:00	natural corundum	1599	1637	4.97	3200000000	0.05	1230000	0.06	6.56	0.05	2.66	0.1	-0.038716	0.11
WEK1_Lieser_K2@1.asc	15:05:00	natural corundum	1055	2531	4.97	3250000000	0.06	1250000	0.05	3.17	0.05	0.9	0.15	-0.018218	0.15
WEK1_Lieser_K2@2.asc	15:09:00	natural corundum	1081	2422	4.97	3170000000	0.04	1210000	0.05	2.7	0.05	0.59	0.14	-0.0812383	0.14
WEK1_Lieser_K2@3.asc	15:12:00	natural corundum	1047	2384	4.97	3230000000	0.05	1240000	0.05	3.33	0.05	1.05	0.12	0.0477609	0.12
WEK1_Lieser_K2@4.asc	15:16:00	natural corundum	894	2491	4.96	3220000000	0.04	1230000	0.05	2.71	0.05	0.58	0.15	-0.0965204	0.15
WEK1_Kyll_K7@1.asc	15:52:00	natural corundum	334	-1554	4.88	3140000000	0.04	1210000	0.04	8.43	0.05	3.57	0.15	-0.109551	0.15
WEK1_Kyll_K7@2.asc	15:56:00	natural corundum	365	-1547	4.88	3150000000	0.07	1210000	0.08	8.06	0.07	3.5	0.17	0.0143038	0.17
WEK1_Kyll_K7@3.asc	16:00:00	natural corundum	389	-1633	4.87	3140000000	0.05	1200000	0.06	8.53	0.07	3.59	0.18	-0.141934	0.19
WEK1_Kyll_K1@1.asc	16:38:00	natural corundum	1126	-938	4.82	3130000000	0.02	1200000	0.02	8.04	0.05	3.37	0.16	-0.105062	0.17
WEK1_Kyll_K1@2.asc	16:42:00	natural corundum	1162	-973	4.82	3110000000	0.04	1190000	0.04	8.01	0.05	3.58	0.11	0.120387	0.12
WEK1_Kyll_K1@3.asc	16:45:00	natural corundum	1162	-1008	4.81	3100000000	0.04	1190000	0.04	8.01	0.06	3.55	0.1	0.0904279	0.11
WEK1_Kyll_K1@4.asc	16:49:00	natural corundum	1126	-1008	4.81	3130000000	0.05	1200000	0.05	8.27	0.06	3.66	0.11	0.0641036	0.12
HK1_K6@1.asc	17:29:00	natural corundum	726	-1260	4.73	3240000000	0.05	1250000	0.05	7.03	0.05	2.75	0.12	-0.195245	0.12
HK1_K6@2.asc	17:34:00	natural corundum	761	-1216	4.72	3230000000	0.05	1240000	0.05	6.93	0.05	2.92	0.13	0.0270828	0.13
HK1_K6@3.asc	17:38:00	natural corundum	763	-1295	4.72	3250000000	0.04	1250000	0.05	6.99	0.05	2.67	0.17	-0.254233	0.17
HK1_K6@4.asc	17:41:00	natural corundum	792	-1249	4.71	3230000000	0.06	1240000	0.06	7.01	0.06	2.86	0.14	-0.0748242	0.14
HK1_K6@5.asc	17:46:00	natural corundum	668	-1291	4.7	3250000000	0.05	1250000	0.05	6.96	0.06	2.75	0.11	-0.158542	0.11								δ18O (‰)	δ17O (‰)	Δ'17O (‰)	N	1SD (Δ'17O)
HK1_K6@6.asc	17:50:00	natural corundum	684	-1219	4.71	3230000000	0.04	1240000	0.04	6.92	0.06	3	0.11	0.112267	0.11
LR-sector_s@1.asc	18:01:00	HD-LR1 sector	-716	-4161	4.68	3010000000	0.04	1160000	0.04	15.79	0.06	7	0.11			18.6023	0.06	9.24462	0.11	-0.529635	0.11		18.5201	9.28882	-0.443223	5	0.115469
LR-sector_s@2.asc	18:05:00	HD-LR1 sector	-716	-4111	4.68	3010000000	0.05	1160000	0.05	15.71	0.05	7.02	0.09			18.5221	0.05	9.26471	0.09	-0.468146	0.1
LR-sector_s@3.asc	18:09:00	HD-LR1 sector	-716	-4061	4.68	3010000000	0.04	1160000	0.05	15.73	0.04	6.99	0.12			18.5422	0.04	9.23458	0.12	-0.508399	0.12
LR-sector_s@4.asc	18:12:00	HD-LR1 sector	-716	-4011	4.68	3010000000	0.03	1160000	0.04	15.69	0.04	7.01	0.15			18.502	0.04	9.25467	0.15	-0.467701	0.15
LR-sector_s@5.asc	18:16:00	HD-LR1 sector	-716	-3961	4.68	3000000000	0.05	1160000	0.06	15.62	0.06	7.2	0.12			18.4319	0.06	9.44551	0.12	-0.242234	0.13
LR-sector_n@1.asc	18:22:00	HD-LR1 sector	-600	1310	4.66	2980000000	0.04	1150000	0.04	15.32	0.04	7.07	0.16			18.131	0.04	9.31493	0.16	-0.215612	0.16		18.2296	9.2463	-0.334753	6	0.115187
LR-sector_n@2.asc	18:25:00	HD-LR1 sector	-600	1260	4.65	2980000000	0.03	1150000	0.04	15.43	0.06	7.04	0.17			18.2413	0.06	9.2848	0.17	-0.302668	0.18
LR-sector_n@3.asc	18:29:00	HD-LR1 sector	-600	1210	4.64	2960000000	0.03	1140000	0.03	15.42	0.05	7.02	0.18			18.2313	0.05	9.26471	0.18	-0.317372	0.18
LR-sector_n@4.asc	18:33:00	HD-LR1 sector	-600	1160	4.63	2960000000	0.03	1140000	0.03	15.34	0.05	7.07	0.12			18.1511	0.05	9.31493	0.12	-0.226012	0.13
LR-sector_n@5.asc	18:36:00	HD-LR1 sector	-600	1110	4.63	2960000000	0.04	1140000	0.05	15.44	0.06	6.89	0.15			18.2514	0.06	9.13413	0.15	-0.457159	0.16
LR-sector_c@1.asc	18:47:00	HD-LR1 sector	-635	-1434	4.6	2960000000	0.03	1140000	0.02	15.55	0.07	6.99	0.15			18.3617	0.07	9.23458	0.15	-0.414823	0.16		18.4703	9.31326	-0.393186	6	0.0613062
LR-sector_c@2.asc	18:50:00	HD-LR1 sector	-635	-1384	4.61	2960000000	0.04	1140000	0.04	15.74	0.05	7.01	0.14			18.5522	0.05	9.25467	0.14	-0.493693	0.15
LR-sector_c@3.asc	18:54:00	HD-LR1 sector	-635	-1334	4.61	2950000000	0.04	1140000	0.04	15.66	0.06	7.07	0.13			18.472	0.06	9.31493	0.13	-0.392393	0.14
LR-sector_c@4.asc	18:57:00	HD-LR1 sector	-635	-1284	4.6	2960000000	0.03	1140000	0.04	15.67	0.06	7.13	0.2			18.482	0.06	9.3752	0.2	-0.337883	0.2
LR-sector_c@5.asc	19:01:00	HD-LR1 sector	-635	-1234	4.59	2950000000	0.04	1140000	0.05	15.5	0.06	6.98	0.17			18.3115	0.06	9.22453	0.17	-0.398779	0.17
LR-sector_c@6.asc	19:05:00	HD-LR1 sector	-635	-1184	4.59	2950000000	0.03	1140000	0.04	15.83	0.06	7.23	0.16			18.6424	0.06	9.47564	0.16	-0.321546	0.16
LR-sector_n@6.asc	19:09:00	HD-LR1 sector	-605	1061	4.58	2950000000	0.03	1140000	0.03	15.56	0.06	6.92	0.12			18.3717	0.06	9.16427	0.12	-0.489692	0.13
WEK_KleineKyll_K1@1.asc	19:24:00	natural corundum	-3177	842	4.56	2950000000	0.04	1130000	0.04	8.21	0.05	3.68	0.13	0.115496	0.13
WEK_KleineKyll_K1@2.asc	19:28:00	natural corundum	-3259	810	4.57	2950000000	0.03	1140000	0.03	8.4	0.06	3.38	0.17	-0.283604	0.17
WEK_KleineKyll_K1@3.asc	19:32:00	natural corundum	-3268	909	4.57	2920000000	0.03	1120000	0.03	8.04	0.04	3.24	0.16	-0.23492	0.16
WEK_KleineKyll_K1@4.asc	19:36:00	natural corundum	-3210	907	4.57	2940000000	0.06	1130000	0.07	8.2	0.06	3.45	0.15	-0.108957	0.15
WEK_KleineKyll_K1@5.asc	19:41:00	natural corundum	-3159	892	4.56	2940000000	0.04	1130000	0.04	7.99	0.05	3.49	0.13	0.0409823	0.13
WEK_Alfbach_K1@1.asc	19:59:00	natural corundum	-2496	-1311	4.55	2920000000	0.04	1120000	0.05	4.69	0.04	1.54	0.21	-0.177003	0.21
WEK_Alfbach_K1@2.asc	20:03:00	natural corundum	-2460	-1352	4.55	2920000000	0.01	1120000	0.02	4.75	0.06	1.79	0.15	0.0416023	0.15
WEK_Alfbach_K1@3.asc	20:06:00	natural corundum	-2528	-1359	4.54	2940000000	0.03	1130000	0.03	5.02	0.06	1.74	0.21	-0.150287	0.21
WEK_Alfbach_K1@4.asc	20:10:00	natural corundum	-2493	-1400	4.54	2940000000	0.04	1130000	0.05	5.25	0.06	1.88	0.16	-0.131051	0.16
WEK_Alfbach_K1@5.asc	20:14:00	natural corundum	-2444	-1408	4.53	2930000000	0.19	1130000	0.2	4.98	0.17	1.94	0.22	0.070802	0.24
Corrected values accurate relative to VSMOW; Δ'17O expressed relative to a slope of 0.528 and calculated using δ'18O and δ'17O; δ values include smoothing of FC baselines

## Sheet: Part C
Supplementary Table 1 Part C: δ18O SIMS results for crystallographically oriented samples of HD-LR1.
File	Time	Remarks	δ18O (‰)	δ18O (‰)	1SE (int.) (‰)	X	Y	Ip (nA)	16O (cps)	1SE (%)				Avg (‰)	1SD (‰)	1SE (‰)	N
			measured	normalized to bulk
Ruby_ori_ur_z0@1.asc	19:37:00	⊥c	15.5	18.34	0.13	3497	3741	0.9	978000000	0.03		HD-LR1	measured	15.4667	0.097707	0.0398887	6
Ruby_ori_ur_z0@2.asc	19:39:00	⊥c	15.43	18.26	0.12	3497	3641	0.89	977000000	0.05		⊥c	corrected	18.305	0.0985393	0.0402285	6
Ruby_ori_ur_z0@3.asc	19:42:00	⊥c	15.36	18.2	0.15	3397	3641	0.89	979000000	0.04
Ruby_ori_ur_z0@4.asc	19:44:00	⊥c	15.61	18.45	0.08	3397	3741	0.89	975000000	0.04
Ruby_ori_NIST610_ur_z0@1.asc	19:47:00		10.82		0.08	5773	4936	0.89	1180000000	0.02		NIST610
Ruby_ori_NIST610_ur_z0@2.asc	19:50:00		10.87		0.09	5773	4836	0.89	1180000000	0.04			1. quadrant	10.6058	0.175419	0.0506392	12
Ruby_ori_NIST610_uc_z0@1.asc	19:54:00		10.61		0.14	-299	6221	0.89	1180000000	0.04			4. quadrant	10.5333	0.11957	0.0345169	12
Ruby_ori_NIST610_uc_z0@2.asc	19:56:00		10.75		0.13	-199	6221	0.89	1180000000	0.06
Ruby_ori_NIST610_c_z0@1.asc	20:00:00		10.53		0.12	241	-1398	0.89	1160000000	0.02
Ruby_ori_NIST610_c_z0@2.asc	20:02:00		10.68		0.13	158	-1349	0.89	1170000000	0.05
Ruby_ori_br_z0@1.asc	20:06:00	c60	15.77	18.61	0.12	3262	-3328	0.89	976000000	0.04		HD-LR1	measured	15.57	0.20601	0.0841031	6
Ruby_ori_br_z0@2.asc	20:08:00	c60	15.88	18.72	0.13	3262	-3428	0.88	975000000	0.04		c60	corrected	18.41	0.20601	0.0841031	6
Ruby_ori_br_z0@3.asc	20:11:00	c60	15.37	18.21	0.11	3362	-3428	0.88	973000000	0.03
Ruby_ori_br_z0@4.asc	20:14:00	c60	15.51	18.35	0.11	3362	-3328	0.88	970000000	0.04
Ruby_ori_NIST610_r_z0@1.asc	20:18:00		10.47		0.06	6606	-1535	0.88	1170000000	0.02		NIST610
Ruby_ori_NIST610_r_z0@2.asc	20:20:00		10.21		0.11	6593	-1449	0.88	1150000000	0.06			3. quadrant	10.5125	0.151905	0.0438511	12
Ruby_ori_NIST610_br_z0@1.asc	20:24:00		10.55		0.16	6740	-7426	0.87	1140000000	0.07
Ruby_ori_NIST610_br_z0@2.asc	20:27:00		10.51		0.08	6626	-7395	0.87	1160000000	0.05
Ruby_ori_NIST610_bc_z0@1.asc	20:31:00		10.59		0.12	897	-8858	0.88	1170000000	0.03
Ruby_ori_NIST610_bc_z0@2.asc	20:34:00		10.53		0.08	865	-8749	0.94	1160000000	0.03
Ruby_ori_bl_z0@1.asc	20:37:00	∥c	15.79	18.63	0.12	-2384	-5482	0.88	967000000	0.03		HD-LR1	measured	15.5783	0.283084	0.115569	6
Ruby_ori_bl_z0@2.asc	20:40:00	∥c	15.62	18.46	0.14	-2384	-5382	0.88	963000000	0.03		∥c	corrected	18.4183	0.283084	0.115569	6
Ruby_ori_bl_z0@3.asc	20:42:00	∥c	15.27	18.11	0.11	-2384	-5282	0.88	962000000	0.02
Ruby_ori_bl_z0@4.asc	20:45:00	∥c	15.21	18.05	0.1	-2484	-5282	0.88	962000000	0.03
Ruby_ori_NIST610_bl_z0@1.asc	20:58:00		10.23		0.13	-5622	-8967	0.87	1120000000	0.03		NIST610
Ruby_ori_NIST610_bl_z0@2.asc	21:00:00		10.19		0.11	-5622	-9067	0.87	1120000000	0.05			2. quadrant	10.6775	0.209073	0.0603541	12
Ruby_ori_NIST610_l_z0@1.asc	21:04:00		10.56		0.12	-5663	-1845	0.87	1150000000	0.04
Ruby_ori_NIST610_l_z0@2.asc	21:07:00		10.51		0.11	-5563	-1845	0.87	1150000000	0.06
Ruby_ori_ul_z0@1.asc	21:11:00	c60'	15.47	18.31	0.12	-2916	1706	0.86	958000000	0.03		HD-LR1	measured	15.6167	0.103473	0.0422427	6
Ruby_ori_ul_z0@2.asc	21:13:00	c60'	15.65	18.48	0.14	-2916	1606	0.87	956000000	0.02		c60'	corrected	18.455	0.102908	0.0420119	6
Ruby_ori_ul_z0@3.asc	21:16:00	c60'	15.76	18.6	0.11	-3016	1606	0.86	956000000	0.01
Ruby_ori_ul_z0@4.asc	21:19:00	c60'	15.67	18.51	0.15	-3016	1706	0.86	955000000	0.05
Ruby_ori_NIST610_ul_z0@1.asc	21:22:00		10.95		0.17	-5993	4309	0.86	1140000000	0.54
Ruby_ori_NIST610_ul_z0@2.asc	21:24:00		11.21		0.12	-5893	4309	0.86	1150000000	0.26
Ruby_ori_NIST610_c_z0@3.asc	21:28:00		10.65		0.12	68	-1136	0.86	1130000000	0.03
Ruby_ori_NIST610_c_z0@4.asc	21:30:00		10.52		0.1	132	-1117	0.86	1130000000	0.04
Ruby_ori_NIST610_c_z0@5.asc	21:33:00		10.63		0.32	150	-1249	0.86	1130000000	0.24
Ruby_ori_NIST610_c_z0@6.asc	21:35:00		10.53		0.15	142	-1205	0.85	1130000000	0.15
Ruby_ori_ul_z0@5.asc	21:40:00	c60'	15.53	18.37	0.12	-3013	1793	0.85	949000000	0.03
Ruby_ori_ul_z0@6.asc	21:43:00	c60'	15.62	18.46	0.18	-2913	1793	0.85	946000000	0.08
Ruby_ori_ur_z0@5.asc	21:46:00	⊥c	15.53	18.37	0.1	3380	3550	0.86	947000000	0.03
Ruby_ori_ur_z0@6.asc	21:49:00	⊥c	15.37	18.21	0.14	3480	3550	0.86	942000000	0.05
Ruby_ori_br_z0@5.asc	21:52:00	c60	15.47	18.31	0.1	2996	-3096	0.86	943000000	0.02
Ruby_ori_br_z0@6.asc	21:55:00	c60	15.42	18.26	0.1	2896	-3096	0.85	942000000	0.03
Ruby_ori_bl_z0@5.asc	21:58:00	∥c	15.92	18.76	0.1	-2590	-5208	0.85	951000000	0.05
Ruby_ori_bl_z0@6.asc	22:00:00	∥c	15.66	18.5	0.14	-2490	-5208	0.85	946000000	0.03
Corrected values normalized to a bulk value of +18.40 after correction for a possible X-Y effect based on NIST610 glass analyses in the corresponding mount sectors.

## Sheet: Part D
Supplementary Table 1 Part D: δ18O (RAW) SIMS results for additional HD-LR1 analyses.
RAW data: not drift-corrected and not accurate relative to VSMOW
File	Date	Time	Material	Remarks	δ18O (‰)	1SE (int.) (‰)	mean	1SD (‰)	N	mean	1SD (‰)	X	Y	Ip (nA)	16O (cps)	1SE (%)
					measured (RAW)		grain	replicates on grain	replicates on grain	whole mount	whole mount
S3_1_LRuby@5.asc	2022-05-20	09:27:00	HD-LR1	grain 1	13.9885	0.154447						-1784	-1628	0.893891	9.31434e+08	0.0609719
S3_1_LRuby@6.asc	2022-05-20	09:30:00	HD-LR1	grain 1	14.1008	0.159314						-1972	-1576	0.889352	9.28813e+08	0.0421897
S3_1_LRuby@7.asc	2022-05-20	09:33:00	HD-LR1	grain 1	14.3158	0.111238						-1982	-1630	0.884616	9.26222e+08	0.0450537
S3_1_LRuby@8.asc	2022-05-20	09:36:00	HD-LR1	grain 1	14.3423	0.176388						-1947	-1662	0.879391	9.28065e+08	0.0542568
S3_1_LRuby@9.asc	2022-05-20	09:40:00	HD-LR1	grain 1	14.1946	0.123519						-1898	-1684	0.880027	9.20255e+08	0.0686661
S3_1_LRuby@10.asc	2022-05-20	09:43:00	HD-LR1	grain 1	14.1859	0.134764	14.188	0.13235	6			-1823	-1701	0.87681	9.21041e+08	0.0558532
S3_1_LRuby@12.asc	2022-05-20	10:40:00	HD-LR1	grain 2	13.9915	0.128306						563	676	0.832667	8.76381e+08	0.0509062
S3_1_LRuby@13.asc	2022-05-20	10:43:00	HD-LR1	grain 3	14.4318	0.131787						3984	441	0.831518	8.81496e+08	0.0581153
S3_1_LRuby@14.asc	2022-05-20	11:04:00	HD-LR1	grain 4	14.3984	0.164916						3040	615	0.820549	8.73367e+08	0.0442401
S3_1_LRuby@15.asc	2022-05-20	11:07:00	HD-LR1	grain 5	14.459	0.158278						-362	614	0.818949	8.69167e+08	0.0517602
S3_1_LRuby@16.asc	2022-05-20	11:28:00	HD-LR1	grain 6	14.3215	0.155725						-4114	831	0.802203	8.52533e+08	0.0489352
S3_1_LRuby@17.asc	2022-05-20	11:31:00	HD-LR1	grain 7	14.596	0.119874						-2999	738	0.801533	8.52393e+08	0.0385461
S3_1_LRuby@18.asc	2022-05-20	11:54:00	HD-LR1	grain 8	14.3379	0.103695						2411	472	0.792175	8.4384e+08	0.0565328
S3_1_LRuby@19.asc	2022-05-20	11:57:00	HD-LR1	grain 9	14.2067	0.128975						3098	627	0.790398	8.35067e+08	0.0446818
S3_1_LRuby@20.asc	2022-05-20	12:19:00	HD-LR1	grain 5	14.5765	0.0841767	14.5178	0.0830818	2			-499	594	0.784359	8.40792e+08	0.0440211
S3_1_LRuby@21.asc	2022-05-20	12:22:00	HD-LR1	grain 10	14.4482	0.182227				14.306	0.183743	-1575	778	0.782517	8.30426e+08	0.0498186
S3_2_LRuby@1.asc	2022-05-20	13:00:00	HD-LR1	grain 1	13.9709	0.1261						873	-801	0.842801	8.63882e+08	0.0647218
S3_2_LRuby@2.asc	2022-05-20	13:03:00	HD-LR1	grain 1	14.3028	0.140531						890	-740	0.844826	8.67604e+08	0.0527148
S3_2_LRuby@3.asc	2022-05-20	13:06:00	HD-LR1	grain 1	14.2164	0.160008						822	-831	0.844662	8.65791e+08	0.060254
S3_2_LRuby@4.asc	2022-05-20	13:08:00	HD-LR1	grain 1	14.3003	0.115219	14.2814	0.177873	6			782	-796	0.842427	8.65867e+08	0.0613998
S3_2_LRuby@5.asc	2022-05-20	13:30:00	HD-LR1	grain 2	14.4184	0.127226	14.4613	0.0607366	2			3638	-416	0.835941	8.71538e+08	0.0270819
S3_2_LRuby@6.asc	2022-05-20	13:33:00	HD-LR1	grain 3	14.2198	0.179129	14.3875	0.237197	2			4419	-460	0.833535	8.58722e+08	0.05539
S3_2_LRuby@7.asc	2022-05-20	13:51:00	HD-LR1	grain 4	14.4691	0.131612						-2855	-1124	0.833253	8.64815e+08	0.0486714
S3_2_LRuby@8.asc	2022-05-20	13:54:00	HD-LR1	grain 5	14.7884	0.118837						-4270	-1069	0.829959	8.74215e+08	0.0445938
S3_2_LRuby@9.asc	2022-05-20	13:57:00	HD-LR1	grain 6	14.7303	0.139099	14.6677	0.0438912	5			-5205	-1166	0.828354	8.68369e+08	0.0345445
S3_2_LRuby@10.asc	2022-05-20	14:20:00	HD-LR1	grain 2	14.5043	0.120468						3702	-318	0.818996	8.46685e+08	0.0442662
S3_2_LRuby@11.asc	2022-05-20	14:23:00	HD-LR1	grain 7	14.6105	0.124784						2891	-447	0.819588	8.57174e+08	0.0483793
S3_2_LRuby@12.asc	2022-05-20	14:26:00	HD-LR1	grain 3	14.5553	0.188368						4457	-396	0.819351	8.41618e+08	0.0634661
S3_2_LRuby@13.asc	2022-05-20	14:41:00	HD-LR1	grain 6	14.653	0.124365						-4806	2848	0.817491	8.49773e+08	0.0316513
S3_2_LRuby@14.asc	2022-05-20	14:44:00	HD-LR1	grain 6	14.6216	0.143286						-4711	2852	0.813727	8.46871e+08	0.0404738
S3_2_LRuby@15.asc	2022-05-20	14:47:00	HD-LR1	grain 1	14.4672	0.144628						732	-852	0.80974	8.38822e+08	0.050461
S3_2_LRuby@16.asc	2022-05-20	14:50:00	HD-LR1	grain 1	14.4305	0.101972						838	-862	0.811033	8.42603e+08	0.0439182
S3_2_LRuby@17.asc	2022-05-20	14:54:00	HD-LR1	grain 6	14.6937	0.135071						-5276	-1246	0.806078	8.5911e+08	0.0518015
S3_2_LRuby@18.asc	2022-05-20	14:57:00	HD-LR1	grain 6	14.6399	0.133405				14.4774	0.21264	-5266	-1088	0.808174	8.58021e+08	0.0637138
S2_1_LRuby@7.asc	2022-05-20	15:36:00	HD-LR1	grain 1	14.8061	0.169911						4539	3201	0.805966	8.67004e+08	0.0489435
S2_1_LRuby@8.asc	2022-05-20	15:38:00	HD-LR1	grain 1	14.7406	0.11873	14.7278	0.0762883	4			4522	3154	0.80598	8.66777e+08	0.0651623
S2_1_LRuby@9.asc	2022-05-20	15:41:00	HD-LR1	grain 2	14.9664	0.199325						-845	3380	0.802683	8.8167e+08	0.0638098
S2_1_LRuby@10.asc	2022-05-20	15:44:00	HD-LR1	grain 2	15.0755	0.153179	14.9638	0.133739	4			-734	3380	0.801473	8.86506e+08	0.0618887
S2_1_LRuby@11.asc	2022-05-20	15:48:00	HD-LR1	grain 3	14.9099	0.130292						-552	-2345	0.805088	8.82372e+08	0.0612308
S2_1_LRuby@12.asc	2022-05-20	15:50:00	HD-LR1	grain 3	14.9093	0.131955	15.0524	0.170577	10			-539	-2390	0.805137	8.83671e+08	0.0589599
S2_1_LRuby@13.asc	2022-05-20	15:54:00	HD-LR1	grain 4	14.3483	0.166016						3077	-2359	0.803762	8.72424e+08	0.0518351
S2_1_LRuby@14.asc	2022-05-20	15:56:00	HD-LR1	grain 4	14.5102	0.115615						3003	-2364	0.803923	8.70921e+08	0.0443118
S2_1_LRuby@15.asc	2022-05-20	15:59:00	HD-LR1	grain 4	14.4783	0.129914						3038	-2393	0.803472	8.69497e+08	0.0584107
S2_1_LRuby@16.asc	2022-05-20	16:01:00	HD-LR1	grain 4	14.5341	0.165854	14.8566	0.296316	13			3020	-2320	0.801832	8.65834e+08	0.0522388
S2_1_LRuby@17.asc	2022-05-20	16:24:00	HD-LR1	grain 2	15.0381	0.12998						-872	3333	0.798752	8.73091e+08	0.0580979
S2_1_LRuby@18.asc	2022-05-20	16:27:00	HD-LR1	grain 2	14.775	0.110086						-829	3327	0.796031	8.70647e+08	0.0500417
S2_1_LRuby@19.asc	2022-05-20	16:48:00	HD-LR1	grain 5	14.8669	0.132912						1683	3105	0.784442	8.64325e+08	0.0567334
S2_1_LRuby@20.asc	2022-05-20	16:50:00	HD-LR1	grain 5	14.6205	0.161891	14.7437	0.174192	2			1684	3067	0.785896	8.5708e+08	0.0535173
S2_1_LRuby@21.asc	2022-05-20	17:12:00	HD-LR1	grain 1	14.7415	0.127745						4529	3110	0.786348	8.55686e+08	0.056344
S2_1_LRuby@22.asc	2022-05-20	17:15:00	HD-LR1	grain 1	14.6231	0.150667						4575	3120	0.78687	8.55376e+08	0.0514486
S2_1_LRuby@23.asc	2022-05-20	17:37:00	HD-LR1	grain 3	15.1274	0.148243						-488	-2409	0.783167	8.67028e+08	0.0282179
S2_1_LRuby@24.asc	2022-05-20	17:39:00	HD-LR1	grain 3	15.2731	0.180598						-434	-2402	0.780964	8.68448e+08	0.0493846
S2_1_LRuby@25.asc	2022-05-20	18:00:00	HD-LR1	grain 4	14.9876	0.172322						3095	-2302	0.777877	8.54169e+08	0.0536812
S2_1_LRuby@26.asc	2022-05-20	18:02:00	HD-LR1	grain 4	14.9772	0.171701						3084	-2400	0.778362	8.52797e+08	0.0482636
S2_1_LRuby@27.asc	2022-05-20	18:29:00	HD-LR1	grain 3	15.1101	0.146076						-445	-2313	0.773975	8.55715e+08	0.0303724
S2_1_LRuby@28.asc	2022-05-20	18:32:00	HD-LR1	grain 3	15.123	0.173396						-401	-2400	0.771973	8.54738e+08	0.046945
S2_1_LRuby@29.asc	2022-05-20	18:36:00	HD-LR1	grain 4	14.7292	0.152404						3150	-2404	0.771219	8.48136e+08	0.062517
S2_1_LRuby@30.asc	2022-05-20	18:38:00	HD-LR1	grain 4	14.9857	0.172402						3140	-2459	0.773985	8.44397e+08	0.0413523
S2_1_LRuby@31.asc	2022-05-20	18:59:00	HD-LR1	grain 3	14.6891	0.143143						-612	-2420	0.766465	8.44343e+08	0.0383379
S2_1_LRuby@32.asc	2022-05-20	19:03:00	HD-LR1	grain 3	15.0782	0.25091						-628	-2373	0.766756	8.42545e+08	0.0358507
S2_1_LRuby@33.asc	2022-05-20	19:23:00	HD-LR1	grain 3	15.2065	0.127627						-370	-2326	0.761408	8.45371e+08	0.0559055
S2_1_LRuby@34.asc	2022-05-20	19:26:00	HD-LR1	grain 3	15.0974	0.148937						-372	-2372	0.765286	8.37665e+08	0.0492555
S2_1_LRuby@35.asc	2022-05-20	19:29:00	HD-LR1	grain 4	15.0116	0.133347						2975	-2463	0.762329	8.34e+08	0.056699
S2_1_LRuby@36.asc	2022-05-20	19:32:00	HD-LR1	grain 4	15.1665	0.122776						2952	-2427	0.763588	8.2884e+08	0.0520541
S2_1_LRuby@37.asc	2022-05-20	19:35:00	HD-LR1	grain 4	15.1942	0.104689						2802	-6062	0.762071	8.54864e+08	0.0342914
S2_1_LRuby@38.asc	2022-05-20	19:38:00	HD-LR1	grain 4	15.0604	0.141209						2853	-6055	0.761553	8.50465e+08	0.0304904
S2_1_LRuby@39.asc	2022-05-20	19:40:00	HD-LR1	grain 4	15.1531	0.148271				14.9065	0.240825	2850	-6094	0.760282	8.52843e+08	0.0519826
HK1_LRuby_UC1@1.asc	2022-05-22	12:42:00	HD-LR1	UC1	14.5498	0.0692957	14.6877	0.122502	6			-966	986	1.19185	1.20008e+09	0.0100801
HK1_LRuby_UC2@1.asc	2022-05-22	12:45:00	HD-LR1	UC2	14.6466	0.121837	14.6918	0.199583	6			-980	2996	1.17871	1.17418e+09	0.0168645
HK1_LRuby_UL@1.asc	2022-05-22	12:49:00	HD-LR1	UL	14.7261	0.124613	14.7634	0.2575	4			-5064	3050	1.16252	1.17035e+09	0.00604703
HK1_LRuby_CL@1.asc	2022-05-22	12:52:00	HD-LR1	CL	14.8749	0.113235	15.0146	0.255454	6			-5222	-677	1.15071	1.17609e+09	0.00987016
HK1_UC1@2.asc	2022-05-22	13:27:00	HD-LR1	UC1	14.6454	0.107874						-1024	914	1.07897	1.08428e+09	0.0378265
HK1_UC2@2.asc	2022-05-22	13:30:00	HD-LR1	UC2	14.5485	0.115863						-1076	2941	1.07365	1.07112e+09	0.0418024
HK1_UL@2.asc	2022-05-22	13:33:00	HD-LR1	UL	14.7358	0.137751						-5095	2982	1.06888	1.07066e+09	0.0315583
HK1_CL@2.asc	2022-05-22	13:37:00	HD-LR1	CL	14.7672	0.12137						-5171	-701	1.06309	1.07467e+09	0.0277794
HK1_UC1@3.asc	2022-05-22	14:17:00	HD-LR1	UC1	14.6173	0.107575						-1030	1056	1.01161	1.02012e+09	0.0434798
HK1_UC2@3.asc	2022-05-22	14:21:00	HD-LR1	UC2	14.5226	0.133483						-1079	2876	1.00864	1.00878e+09	0.0394455
HK1_UL@3.asc	2022-05-22	14:24:00	HD-LR1	UL	14.4839	0.0779853						-5054	3117	1.00473	1.01311e+09	0.0325364
HK1_CL@3.asc	2022-05-22	14:27:00	HD-LR1	CL	14.9668	0.141945						-5217	-722	1.00207	1.01987e+09	0.0256805
HK1_UC1@4.asc	2022-05-22	14:54:00	HD-LR1	UC1	14.7755	0.134224						-1025	856	0.977423	9.84249e+08	0.0320324
HK1_UC2@4.asc	2022-05-22	14:58:00	HD-LR1	UC2	14.5461	0.107922						-1030	2911	0.976797	9.75848e+08	0.0328125
HK1_UL@4.asc	2022-05-22	15:01:00	HD-LR1	UL	15.1078	0.189837						-5123	2945	0.970148	9.88875e+08	0.051032
HK1_CL@4.asc	2022-05-22	15:04:00	HD-LR1	CL	14.8392	0.112848						-5171	-645	0.970148	9.85003e+08	0.0291536
HK1_NIST610_UC1@5.asc	2022-05-22	15:20:00	HD-LR0	UC1	14.5856	0.151708						-1026	1109	0.895347	9.5792e+08	0.0450081
HK1_UC2@5.asc	2022-05-22	15:24:00	HD-LR1	UC2	14.9472	0.121986						-990	2956	0.895858	9.57148e+08	0.0396088
HK1_UR@1.asc	2022-05-22	15:27:00	HD-LR1	UR	14.6909	0.0884267	14.7583	0.0953324	2			3691	2374	0.895632	9.54417e+08	0.0322759
HK1_CR@1.asc	2022-05-22	15:30:00	HD-LR1	CR	14.8485	0.179768	14.7247	0.175107	2			4146	293	0.894427	9.58549e+08	0.0411492
HK1_UC1@6.asc	2022-05-22	16:04:00	HD-LR1	UC1	14.8507	0.147287						-956	805	0.866371	9.28756e+08	0.0467846
HK1_UC2@6.asc	2022-05-22	16:07:00	HD-LR1	UC2	14.9398	0.137862						-920	3013	0.865243	9.25365e+08	0.0457721
HK1_UR@2.asc	2022-05-22	16:10:00	HD-LR1	UR	14.8257	0.12122						3769	2350	0.863239	9.27748e+08	0.0368835
HK1_CR@2.asc	2022-05-22	16:13:00	HD-LR1	CR	14.6009	0.109469						4164	179	0.863578	9.23027e+08	0.0409966
HK1_LRuby_new@1.asc	2022-05-22	16:24:00	HD-LR1	New	14.9758	0.147717	15.0186	0.165145	9			-973	-1575	0.853864	9.24983e+08	0.0380161
HK1_LRuby_new@2.asc	2022-05-22	16:27:00	HD-LR1	New	15.0559	0.132055						-1073	-1575	0.853127	9.24579e+08	0.042645
HK1_LRuby_new@3.asc	2022-05-22	16:30:00	HD-LR1	New	15.1103	0.0873875						-1882	-1579	0.851292	9.25308e+08	0.0427302
HK1_LRuby_new@4.asc	2022-05-22	16:32:00	HD-LR1	New	15.0758	0.0916726						-1982	-1579	0.849327	9.25126e+08	0.0369947
HK1_LRuby_new@5.asc	2022-05-22	16:42:00	HD-LR1	New	14.9115	0.122472						-897	-1575	0.844988	9.19677e+08	0.0472094
HK1_BC@1.asc	2022-05-22	16:45:00	HD-LR1	BC	15.1523	0.13679	15.066	0.112481	5			-959	-4543	0.842368	9.15879e+08	0.0276548
HK1_BR@1.asc	2022-05-22	16:48:00	HD-LR1	BR	14.6716	0.177183	14.8214	0.149236	3			3599	-3860	0.842853	9.02609e+08	0.0383695
HK1_CR2@1.asc	2022-05-22	16:52:00	HD-LR1	CR2	14.7262	0.186769	14.8136	0.147464	3			4076	-1781	0.842589	9.00837e+08	0.0193417
HK1_LRuby_new@6.asc	2022-05-22	17:29:00	HD-LR1	New	14.6637	0.14012						-1137	-1604	0.821495	8.93053e+08	0.0489512
HK1_BC@2.asc	2022-05-22	17:34:00	HD-LR1	BC	14.9702	0.157639						-959	-4643	0.81997	8.93564e+08	0.0395048
HK1_BR@2.asc	2022-05-22	17:38:00	HD-LR1	BR	14.97	0.139521						3711	-3878	0.817322	8.88085e+08	0.0458552
HK1_CR2@2.asc	2022-05-22	17:43:00	HD-LR1	CR2	14.9838	0.127747						4093	-1689	0.814475	8.84307e+08	0.0391515
HK1_LRuby_new@7.asc	2022-05-22	19:32:00	HD-LR1	New	15.2091	0.153737						-1220	-1603	0.862209	9.31359e+08	0.0329177
HK1_BC@3.asc	2022-05-22	19:36:00	HD-LR1	BC	15.2124	0.136358						-961	-4736	0.86027	9.32624e+08	0.0183751
HK1_BR@3.asc	2022-05-22	19:39:00	HD-LR1	BR	14.8227	0.147767						3589	-3945	0.86009	9.24579e+08	0.033436
HK1_CR2@3.asc	2022-05-22	19:42:00	HD-LR1	CR2	14.7308	0.163749						4099	-1621	0.858331	9.23077e+08	0.0312166
HK1_LRuby_new@8.asc	2022-05-22	19:46:00	HD-LR1	New	14.9796	0.153454						-1934	-1546	0.855286	9.29567e+08	0.0405028
HK1_BC@4.asc	2022-05-22	19:50:00	HD-LR1	BC	15.0376	0.0946188						-971	-4811	0.858536	9.30909e+08	0.027438
HK1_BL@1.asc	2022-05-22	19:53:00	HD-LR1	BL	15.3811	0.132682						-4838	-4843	0.852702	9.33058e+08	0.0303579
HK1_CL@5.asc	2022-05-22	19:56:00	HD-LR1	CL	15.4343	0.139153						-5062	-1018	0.853684	9.39672e+08	0.0278159
HK1_LRuby_new@9.asc	2022-05-22	20:47:00	HD-LR1	New	15.186	0.103517						-2006	-1657	0.83727	9.12475e+08	0.0374277
HK1_BC@5.asc	2022-05-22	20:50:00	HD-LR1	BC	14.9576	0.159843						-1035	-4901	0.840924	9.13098e+08	0.0357008
HK1_BL@2.asc	2022-05-22	20:54:00	HD-LR1	BL	15.4818	0.108291	15.4315	0.0711664	2			-4822	-4793	0.838695	9.1397e+08	0.037236
HK1_CL@6.asc	2022-05-22	20:57:00	HD-LR1	CL	15.2053	0.115552				14.8864	0.247836	-5071	-972	0.837882	9.12079e+08	0.0337872
WEK1_LR-c@3.asc	2022-07-25	13:52:00	HD-LR1	c	12.7509	0.151911						-1251	-483	1.87568	9.43066e+08	0.0151911
WEK1_LR-c@4.asc	2022-07-25	13:55:00	HD-LR1	c	12.8988	0.140862	12.8322	0.182369	10			-2	-350	1.87128	9.33585e+08	0.0140862
WEK1_LR-e@3.asc	2022-07-25	13:59:00	HD-LR1	e	12.9448	0.152256						4197	1241	1.88315	9.31947e+08	0.0152256
WEK1_LR-e@4.asc	2022-07-25	14:02:00	HD-LR1	e	12.9522	0.107142	13.0052	0.215455	4			4191	1174	1.87774	9.33055e+08	0.0107142
WEK1_LR-c@5.asc	2022-07-25	14:53:00	HD-LR1	c	12.8025	0.131074						114	-345	1.88529	9.28034e+08	0.0131074
WEK1_LR-c@6.asc	2022-07-25	14:56:00	HD-LR1	c	13.0464	0.137116						4	-337	1.89171	9.32962e+08	0.0137116
WEK1_LR-e@5.asc	2022-07-25	14:59:00	HD-LR1	e	13.3132	0.096846						4157	1123	1.89595	9.29184e+08	0.0096846
WEK1_LR-e@6.asc	2022-07-25	15:02:00	HD-LR1	e	12.8104	0.134442						4132	1072	1.89539	9.31492e+08	0.0134442
WEK1_LR-c@7.asc	2022-07-25	15:44:00	HD-LR1	c	13.1144	0.0973916						-42	-302	1.90643	9.41651e+08	0.00973916
WEK1_LR-c@8.asc	2022-07-25	15:46:00	HD-LR1	c	12.6316	0.118243						158	-353	1.90042	9.27928e+08	0.0118243
WEK1_LR-n@3.asc	2022-07-25	15:50:00	HD-LR1	n	12.9541	0.110553						-794	3992	1.90117	9.46279e+08	0.0110553
WEK1_LR-n@4.asc	2022-07-25	15:53:00	HD-LR1	n	13.1683	0.141119	13.0612	0.151476	2			-799	3941	1.89809	9.46744e+08	0.0141119
WEK1_LR-c@9.asc	2022-07-25	16:34:00	HD-LR1	c	12.7761	0.149191						-1286	-505	1.88056	9.38562e+08	0.0149191
WEK1_LR-c@10.asc	2022-07-25	16:37:00	HD-LR1	c	12.661	0.0979206						-1216	-365	1.87541	9.25188e+08	0.00979206
WEK1_LR-c@11.asc	2022-07-25	16:40:00	HD-LR1	c	12.6093	0.122592						-1192	-397	1.88334	9.18843e+08	0.0122592
WEK1_LR-c@12.asc	2022-07-25	16:43:00	HD-LR1	c	13.0308	0.144535				12.904	0.200579	-1299	-396	1.87143	9.25723e+08	0.0144535
HK1_LR_sw@1.asc	2022-07-26	11:37:00	HD-LR1	sw	14.6625	0.145888	Significant instrumental drift during session					-4449	-5082	1.23941	7.01588e+08	0.019993
HK1_LR_sw@2.asc	2022-07-26	11:40:00	HD-LR1	sw	14.3188	0.173301	- no grain mean calculated					-4521	-5040	1.24463	7.03322e+08	0.0224191
HK1_LR_s@4.asc	2022-07-26	11:44:00	HD-LR1	s	14.6658	0.193056						-656	-5581	1.24857	7.01892e+08	0.030664
HK1_LR_c@3.asc	2022-07-26	11:48:00	HD-LR1	c	14.3077	0.162836						-1154	-487	1.2476	7.0268e+08	0.0275229
HK1_LR_sw@3.asc	2022-07-26	12:31:00	HD-LR1	sw	14.4314	0.144247						-4526	-5102	1.22612	6.87336e+08	0.0267683
HK1_LR_s@5.asc	2022-07-26	12:35:00	HD-LR1	s	14.4665	0.103636						-716	-5462	1.2257	6.87499e+08	0.0253037
HK1_LR_c@4.asc	2022-07-26	12:39:00	HD-LR1	c	14.7049	0.201131						-1351	-591	1.22293	6.88688e+08	0.0242205
HK1_LR_c@5.asc	2022-07-26	12:42:00	HD-LR1	c	14.3719	0.103757						-4751	-265	1.22033	6.86114e+08	0.0137841
HK1_LR_w@1.asc	2022-07-26	13:26:00	HD-LR1	w	14.726	0.152207						-4844	-246	1.19754	6.74406e+08	0.02792
HK1_LR_c@6.asc	2022-07-26	13:29:00	HD-LR1	c	14.4595	0.158832						-1172	-480	1.20039	6.67846e+08	0.0271753
HK1_LR_n@3.asc	2022-07-26	13:33:00	HD-LR1	n	14.1093	0.171672						188	4201	1.19593	6.68041e+08	0.0280849
HK1_LR_nw@1.asc	2022-07-26	13:37:00	HD-LR1	nw	14.5633	0.152675						-4002	4299	1.1909	6.68722e+08	0.0230959
HK1_nw@2.asc	2022-07-26	14:17:00	HD-LR1	nw	14.7949	0.157001						-4019	4340	1.17264	6.58176e+08	0.0303004
HK1_w@2.asc	2022-07-26	14:21:00	HD-LR1	w	14.9084	0.164968						-4768	-350	1.17129	6.57508e+08	0.0276278
HK1_c@7.asc	2022-07-26	14:25:00	HD-LR1	c	14.2471	0.146275						1197	-426	1.17182	6.53624e+08	0.0345335
HK1_c@8.asc	2022-07-26	14:28:00	HD-LR1	c	14.4178	0.182624						1174	-481	1.16941	6.49985e+08	0.0384304
HK1_LR_c@9.asc	2022-07-26	15:16:00	HD-LR1	c	14.8531	0.155401						1141	-514	1.24463	6.96534e+08	0.0380437
HK1_LR_e@1.asc	2022-07-26	15:20:00	HD-LR1	e	14.8052	0.169454						4978	-1204	1.24489	6.91978e+08	0.0375797
HK1_LR_ne@1.asc	2022-07-26	15:24:00	HD-LR1	ne	14.7108	0.173511						4773	2745	1.24358	6.98118e+08	0.0344641
HK1_LR_n@5.asc	2022-07-26	15:28:00	HD-LR1	n	15.1934	0.141086						74	4227	1.239	6.95719e+08	0.032892
HK1_LR_n@6.asc	2022-07-26	15:31:00	HD-LR1	n	15.0605	0.158132						135	4208	1.23659	6.91324e+08	0.0285183
HK1_LR_c@10.asc	2022-07-26	16:14:00	HD-LR1	c	14.9621	0.214175						1283	-469	1.22458	6.81082e+08	0.0163386
HK1_LR_e@2.asc	2022-07-26	16:18:00	HD-LR1	e	14.6618	0.221155						4885	-1485	1.2212	6.82085e+08	0.0307454
HK1_LR_se@1.asc	2022-07-26	16:22:00	HD-LR1	se	15.2995	0.148686						3833	-5674	1.21921	6.86913e+08	0.0257573
HK1_LR_s@6.asc	2022-07-26	16:27:00	HD-LR1	s	15.1903	0.132949						-568	-5499	1.21849	6.8422e+08	0.0330755
HK1_LR_s@7.asc	2022-07-26	16:30:00	HD-LR1	s	15.1843	0.21293						-474	-5535	1.21703	6.82082e+08	0.00952271
HK1_LR_c@11.asc	2022-07-26	17:12:00	HD-LR1	c	14.8863	0.134245						1211	-449	1.20554	6.74741e+08	0.027665
HK1_LR_e@3.asc	2022-07-26	17:16:00	HD-LR1	e	14.518	0.190558						4959	-1280	1.20558	6.72746e+08	0.0254369
HK1_LR_s@8.asc	2022-07-26	17:20:00	HD-LR1	s	14.9508	0.183876						-391	-5575	1.20148	6.76133e+08	0.019834
HK1_LR_c@12.asc	2022-07-26	17:57:00	HD-LR1	c	14.8994	0.141464						1199	-550	1.18797	6.68952e+08	0.0356923
HK1_LR_e@4.asc	2022-07-26	18:01:00	HD-LR1	e	14.8814	0.121934						4937	-1373	1.19101	6.64833e+08	0.0238145
HK1_LR_se@3.asc	2022-07-26	18:05:00	HD-LR1	se	15.2575	0.167302						4064	-5745	1.18605	6.67602e+08	0.0192299
HK1_LR_s@9.asc	2022-07-26	18:08:00	HD-LR1	s	15.4316	0.216677				14.7546	0.333679	-496	-5653	1.18669	6.65832e+08	0.0159805
HK1_true_LR-c@3.asc	2022-07-26	19:51:00	HD-LR1	c	14.7743	0.122069	14.682	0.166899	5			565	-340	1.15379	6.39118e+08	0.0204099
HK1_true_LR-e@3.asc	2022-07-26	19:55:00	HD-LR1	e	14.5549	0.165615	14.5549					4092	442	1.15563	6.38706e+08	0.0255219
HK1_true_LR-se@3.asc	2022-07-26	19:59:00	HD-LR1	se	14.3707	0.118718						3632	-3086	1.15394	6.40897e+08	0.0325892
HK1_true_LR-s@3.asc	2022-07-26	20:02:00	HD-LR1	se	14.618	0.16927	14.4944	0.174832	2			-968	-4007	1.15267	6.36071e+08	0.00839223
HK1_true_LR-c@4.asc	2022-07-26	21:02:00	HD-LR1	c	14.8606	0.226249						374	-329	1.13002	6.2936e+08	0.0399492
HK1_true_LR-c@5.asc	2022-07-26	21:05:00	HD-LR1	c	14.571	0.13411						426	-385	1.13036	6.29035e+08	0.0289179
HK1_true_LR-c@6.asc	2022-07-26	21:08:00	HD-LR1	c	14.7533	0.187472						414	-201	1.12965	6.26187e+08	0.0211015
HK1_true_LR-c@7.asc	2022-07-26	21:12:00	HD-LR1	c	14.4505	0.156026				14.6192	0.167755	619	-351	1.1307	6.28973e+08	0.0192792
											Avg 1SD of mounts (not drift-corrected)
											0.226722

## Sheet: Part E
Supplementary Table 1 Part E: Δ'17O SIMS results for random fragments of HD-LR1. The Δ'17O value of natural corrundum = -0.052‰
File	Date	Time	Remarks	X	Y	Ip (nA)	16O (cps)	1SE (%)	17O (cps)	1SE (%)	δ18O (‰)	1SE (int.) (‰)	δ17O (‰)	1SE (int.) (‰)	Δ'17O (‰)	1SE (int.) (‰)
											measured		measured		corrected
WEK1_Lieser_K5@1.asc	27.07.2022	13:05:00	natural corundum	1108	400	5.16109	3.38823e+09	0.0570258	1.3008e+06	0.0611307	6.85	0.054978	2.88	0.147504	0.0290612	0.150994
WEK1_Lieser_K5@2.asc	27.07.2022	13:09:00	natural corundum	1107	330	5.15805	3.38204e+09	0.0759271	1.29861e+06	0.0748318	6.99	0.0446821	2.72	0.151012	-0.204257	0.156096		27.07.2022
WEK1_Kyll_K12@1.asc	27.07.2022	13:14:00	natural corundum	694	-3726	5.14292	3.36603e+09	0.0633677	1.29365e+06	0.0629363	8.02	0.0394802	3.52	0.118579	0.0552295	0.123147		Avg Natural	1SD
WEK1_Kyll_K12@2.asc	27.07.2022	13:18:00	natural corundum	655	-3788	5.14836	3.34515e+09	0.055988	1.28499e+06	0.0595102	7.88	0.0384607	3.42	0.168928	0.0286919	0.171826		-0.0500205	0.123616
WEK1_Kyll_K12@3.asc	27.07.2022	13:22:00	natural corundum	669	-3622	5.14033	3.35405e+09	0.062429	1.28907e+06	0.0645215	8.06	0.0588307	3.07	0.148492	-0.415236	0.152349
WEK1_LR@1.asc	27.07.2022	13:39:00	HD-LR1	-45	-5404	5.09196	3.27292e+09	0.0662427	1.26244e+06	0.0704707	15.99	0.0698864	7.3	0.13897	-0.335055	0.143865		Avg HD-LR1
WEK1_LR@2.asc	27.07.2022	13:44:00	HD-LR1	-214	-5433	5.09279	3.30347e+09	0.052145	1.27465e+06	0.0529978	16.5	0.0511392	7.46	0.0981289	-0.440851	0.102041		(excl. Sector)	1SD	N
WEK1_LR@3.asc	27.07.2022	13:48:00	HD-LR1	-118	-5376	5.09136	3.28085e+09	0.0665707	1.26569e+06	0.0674024	15.98	0.0444559	7.41	0.125045	-0.220419	0.130011		-0.34753	0.124439	27
WEK1_LR@4.asc	27.07.2022	13:52:00	HD-LR1	-93	-5401	5.08535	3.25584e+09	0.0619838	1.25626e+06	0.0620921	15.88	0.0511753	7.29	0.155159	-0.287835	0.158585
WEK1_LR@5.asc	27.07.2022	13:55:00	HD-LR1	-93	-5451	5.08182	3.27036e+09	0.0618177	1.26147e+06	0.0615258	16.05	0.0488148	7.21	0.154038	-0.455784	0.157426
WEK1_LR@6.asc	27.07.2022	13:59:00	HD-LR1	-58	-5451	5.06849	3.28037e+09	0.067996	1.26573e+06	0.0708415	16.24	0.042393	7.45	0.162194	-0.31573	0.166451
WEK1_LR@7.asc	27.07.2022	14:03:00	HD-LR1	-23	-5451	5.06902	3.25808e+09	0.0614937	1.25704e+06	0.065306	15.91	0.0570229	7.36	0.131397	-0.233783	0.135846
WEK1_Kyll_K11@1.asc	27.07.2022	14:09:00	natural corundum	1831	-3795	5.05813	3.26969e+09	0.0512496	1.25634e+06	0.0527544	7.25	0.0456724	3.03	0.195437	-0.0307715	0.197412
WEK1_Kyll_K11@2.asc	27.07.2022	14:12:00	natural corundum	1866	-3795	5.04547	3.26781e+09	0.0539883	1.25526e+06	0.0545895	7.19	0.0483829	2.89	0.152863	-0.139214	0.155556
WEK1_Kyll_K11@3.asc	27.07.2022	14:16:00	natural corundum	1901	-3795	5.0374	3.26284e+09	0.0655021	1.25349e+06	0.0637005	6.95	0.0399685	3.01	0.12026	0.106528	0.124875
WEK1_Kyll_K4@1.asc	27.07.2022	14:21:00	natural corundum	2308	-2003	5.02617	3.26658e+09	0.0491491	1.25334e+06	0.052739	4.71	0.0389782	1.67	0.170295	-0.0574348	0.172557
WEK1_Kyll_K4@2.asc	27.07.2022	14:25:00	natural corundum	2343	-2003	5.01292	3.27313e+09	0.0659993	1.25542e+06	0.0675107	4.97	0.0618374	1.93	0.171685	0.0660532	0.175347
WEK1_Kyll_K4@3.asc	27.07.2022	14:28:00	natural corundum	2378	-2038	5.02092	3.26429e+09	0.0651888	1.25257e+06	0.0685278	5.18	0.03609	1.96	0.14297	-0.014259	0.147478
WEK1_Kyll_K5@1.asc	27.07.2022	14:32:00	natural corundum	3592	-3090	5.01979	3.19926e+09	0.073125	1.23037e+06	0.0762405	9.48	0.0513953	4.04	0.144641	-0.189777	0.150139
WEK1_Kyll_K5@2.asc	27.07.2022	14:36:00	natural corundum	3628	-3082	5.01724	3.18794e+09	0.0601182	1.22538e+06	0.0568925	9.28	0.0489195	4.17	0.15565	0.0445968	0.158522
WEK1_Kyll_K5@3.asc	27.07.2022	14:42:00	natural corundum	3629	-3167	5.02092	3.20055e+09	0.0523983	1.23093e+06	0.0516431	9.57	0.040405	4.42	0.152562	0.142388	0.154979
WEK1_Lieser_K3@1.asc	27.07.2022	14:53:00	natural corundum	1609	1707	4.98506	3.20468e+09	0.0633742	1.23004e+06	0.0628687	6.66	0.0396314	2.83	0.138333	0.0787402	0.14226
WEK1_Lieser_K3@2.asc	27.07.2022	14:57:00	natural corundum	1640	1677	4.98385	3.16959e+09	0.0388418	1.21616e+06	0.0433078	6.19	0.0661935	2.35	0.175105	-0.154503	0.176592
WEK1_Lieser_K3@3.asc	27.07.2022	15:01:00	natural corundum	1599	1637	4.97037	3.20237e+09	0.0521639	1.2293e+06	0.0556766	6.56	0.051493	2.66	0.104565	-0.038716	0.108619
WEK1_Lieser_K2@1.asc	27.07.2022	15:05:00	natural corundum	1055	2531	4.97045	3.25311e+09	0.0560762	1.2474e+06	0.0499274	3.17	0.0530763	0.9	0.15125	-0.018218	0.15353
WEK1_Lieser_K2@2.asc	27.07.2022	15:09:00	natural corundum	1081	2422	4.96658	3.16591e+09	0.0439732	1.21328e+06	0.0479706	2.7	0.0468597	0.59	0.136866	-0.0812383	0.139189
WEK1_Lieser_K2@3.asc	27.07.2022	15:12:00	natural corundum	1047	2384	4.96774	3.2296e+09	0.0472967	1.2381e+06	0.0494851	3.33	0.0455981	1.05	0.119334	0.0477609	0.122161
WEK1_Lieser_K2@4.asc	27.07.2022	15:16:00	natural corundum	894	2491	4.95761	3.21566e+09	0.0415487	1.23178e+06	0.0487847	2.71	0.0521993	0.58	0.149721	-0.0965204	0.151921
WEK1_LR@8.asc	27.07.2022	15:21:00	HD-LR1	-81	-345	4.95419	3.15993e+09	0.0344557	1.21857e+06	0.0371729	15.5	0.0491617	7.05	0.20997	-0.329113	0.210885
WEK1_LR@9.asc	27.07.2022	15:25:00	HD-LR1	-99	-293	4.9424	3.15432e+09	0.0527645	1.21659e+06	0.0480203	15.57	0.0552936	6.9	0.163441	-0.514798	0.165396
WEK1_LR@10.asc	27.07.2022	15:28:00	HD-LR1	181	-362	4.9448	3.12453e+09	0.0653449	1.20476e+06	0.0684506	15.85	0.0628994	7.26	0.136022	-0.302092	0.140742
WEK1_LR@11.asc	27.07.2022	15:32:00	HD-LR1	76	-307	4.92554	3.11179e+09	0.0526154	1.1997e+06	0.0565617	15.31	0.0533977	6.87	0.143434	-0.409466	0.14651
WEK1_LR@12.asc	27.07.2022	15:36:00	HD-LR1	-39	-376	4.91352	3.14503e+09	0.0416882	1.2128e+06	0.0461072	15.72	0.062103	7.24	0.135077	-0.254418	0.137253
WEK1_LR@13.asc	27.07.2022	15:39:00	HD-LR1	18	-371	4.90428	3.16141e+09	0.0464603	1.2192e+06	0.0526335	16.01	0.0442261	7.3	0.159313	-0.345448	0.161719
WEK1_LR@14.asc	27.07.2022	15:43:00	HD-LR1	66	-372	4.90334	3.13163e+09	0.0475495	1.20815e+06	0.0491694	15.89	0.0536212	7.54	0.162074	-0.044324	0.16414
WEK1_LR@15.asc	27.07.2022	15:47:00	HD-LR1	108	-383	4.89178	3.11265e+09	0.0475823	1.20041e+06	0.0514242	15.71	0.0520758	6.96	0.160492	-0.527861	0.162772
WEK1_Kyll_K7@1.asc	27.07.2022	15:52:00	natural corundum	334	-1554	4.87706	3.14266e+09	0.0350593	1.20809e+06	0.0410095	8.43	0.0542855	3.57	0.148694	-0.109551	0.150262
WEK1_Kyll_K7@2.asc	27.07.2022	15:56:00	natural corundum	365	-1547	4.88265	3.15278e+09	0.0729295	1.2116e+06	0.0763463	8.06	0.065262	3.5	0.16901	0.0143038	0.173751
WEK1_Kyll_K7@3.asc	27.07.2022	16:00:00	natural corundum	389	-1633	4.87296	3.13543e+09	0.0540269	1.20497e+06	0.0573236	8.53	0.0685941	3.59	0.18499	-0.141934	0.187449
WEK1_LR@16.asc	27.07.2022	16:05:00	HD-LR1	-275	-5420	4.86523	3.09516e+09	0.0488691	1.19399e+06	0.0504659	15.62	0.0477914	7.06	0.164306	-0.38155	0.166452
WEK1_LR@17.asc	27.07.2022	16:09:00	HD-LR1	-320	-5452	4.85438	3.09025e+09	0.0334475	1.19143e+06	0.0362982	15.47	0.0704804	6.86	0.157949	-0.502619	0.159108
WEK1_LR@18.asc	27.07.2022	16:13:00	HD-LR1	-239	-5463	4.85212	3.09493e+09	0.0318198	1.19329e+06	0.0316189	15.58	0.0482704	7.09	0.13583	-0.3309	0.136852
WEK1_LR@19.asc	27.07.2022	16:17:00	HD-LR1	169	-5376	4.85385	3.09533e+09	0.0393601	1.19342e+06	0.0382438	15.95	0.0526193	7.41	0.161813	-0.204828	0.163069
WEK1_Lieser_K6_r@1.asc	27.07.2022	16:22:00	natural corundum	1350	-80	4.83425	3.18135e+09	0.0352704	1.22058e+06	0.0353153	6.28	0.0621819	2.49	0.119521	-0.0617574	0.120967
WEK1_Lieser_K6_r@2.asc	27.07.2022	16:25:00	natural corundum	1397	-38	4.8362	3.14605e+09	0.0278509	1.20735e+06	0.0295867	5.97	0.0696372	2.29	0.142321	-0.0990381	0.143175
WEK1_Lieser_K6_r@3.asc	27.07.2022	16:29:00	natural corundum	1375	12	4.8228	3.13135e+09	0.025818	1.2018e+06	0.0287734	5.68	0.045644	2.26	0.166114	0.023197	0.166807
WEK1_Lieser_K6_r@4.asc	27.07.2022	16:33:00	natural corundum	1428	18	4.82246	3.1165e+09	0.0285006	1.19598e+06	0.029146	5.39	0.0471906	2.09	0.157786	0.00546806	0.158535
WEK1_Kyll_K1@1.asc	27.07.2022	16:38:00	natural corundum	1126	-938	4.82317	3.13047e+09	0.0240042	1.20243e+06	0.0242868	8.04	0.0454728	3.37	0.163764	-0.105062	0.164265
WEK1_Kyll_K1@2.asc	27.07.2022	16:42:00	natural corundum	1162	-973	4.82235	3.10526e+09	0.0354767	1.19325e+06	0.0382143	8.01	0.0505712	3.58	0.112608	0.120387	0.114402
WEK1_Kyll_K1@3.asc	27.07.2022	16:45:00	natural corundum	1162	-1008	4.81127	3.10045e+09	0.0385919	1.19147e+06	0.0361018	8.01	0.062269	3.55	0.103599	0.0904279	0.105338
WEK1_Kyll_K1@4.asc	27.07.2022	16:49:00	natural corundum	1126	-1008	4.81495	3.13154e+09	0.0504963	1.20377e+06	0.0540968	8.27	0.0598071	3.66	0.114531	0.0641036	0.118039
HK1_LR@1.asc	27.07.2022	17:13:00	HD-LR1	776	-283	4.75667	3.04447e+09	0.0466579	1.17375e+06	0.0499036	15.49	0.0557541	6.85	0.129207	-0.522972	0.131867
HK1_LR@2.asc	27.07.2022	17:17:00	HD-LR1	820	-296	4.75941	3.03798e+09	0.0330548	1.17105e+06	0.0396032	15.38	0.0478324	6.91	0.153839	-0.406053	0.155253
HK1_LR@3.asc	27.07.2022	17:21:00	HD-LR1	882	-309	4.74969	3.03584e+09	0.0424174	1.17062e+06	0.0462793	15.57	0.0673443	6.98	0.14548	-0.435174	0.147518
HK1_LR@4.asc	27.07.2022	17:25:00	HD-LR1	939	-323	4.74082	3.04017e+09	0.0533954	1.172e+06	0.0557124	15.64	0.0586137	7.21	0.18101	-0.242681	0.183385
HK1_K6@1.asc	27.07.2022	17:29:00	natural corundum	726	-1260	4.73391	3.24441e+09	0.0469453	1.24541e+06	0.048506	7.03	0.0512368	2.75	0.118802	-0.195245	0.121531
HK1_K6@2.asc	27.07.2022	17:34:00	natural corundum	761	-1216	4.72133	3.23005e+09	0.0474568	1.24059e+06	0.0508234	6.93	0.0464898	2.92	0.132068	0.0270828	0.134767
HK1_K6@3.asc	27.07.2022	17:38:00	natural corundum	763	-1295	4.71619	3.25213e+09	0.0420339	1.24902e+06	0.0455782	6.99	0.0516079	2.67	0.171803	-0.254233	0.17348
HK1_K6@4.asc	27.07.2022	17:41:00	natural corundum	792	-1249	4.71405	3.23215e+09	0.0568597	1.2411e+06	0.0598671	7.01	0.0634498	2.86	0.140428	-0.0748242	0.143942
HK1_K6@5.asc	27.07.2022	17:46:00	natural corundum	668	-1291	4.70455	3.25458e+09	0.0535935	1.25013e+06	0.0537605	6.96	0.0626914	2.75	0.107928	-0.158542	0.111599
HK1_K6@6.asc	27.07.2022	17:50:00	natural corundum	684	-1219	4.7092	3.23373e+09	0.0394169	1.24219e+06	0.0389692	6.92	0.0587865	3	0.109259	0.112267	0.111179
LR-sector_s@1.asc	27.07.2022	18:01:00	HD-LR1	-716	-4161	4.67898	3.01227e+09	0.0365232	1.16185e+06	0.039351	15.79	0.0578957	7	0.105281	-0.529635	0.107312
LR-sector_s@2.asc	27.07.2022	18:05:00	HD-LR1	-716	-4111	4.68262	3.01114e+09	0.0509312	1.16089e+06	0.0514831	15.71	0.0450243	7.02	0.093205	-0.468146	0.0970881
LR-sector_s@3.asc	27.07.2022	18:09:00	HD-LR1	-716	-4061	4.68435	3.00713e+09	0.0395936	1.15985e+06	0.0469029	15.73	0.0448154	6.99	0.119306	-0.508399	0.12185
LR-sector_s@4.asc	27.07.2022	18:12:00	HD-LR1	-716	-4011	4.68314	3.00855e+09	0.0327045	1.16077e+06	0.0361216	15.69	0.0399347	7.01	0.147665	-0.467701	0.148891
LR-sector_s@5.asc	27.07.2022	18:16:00	HD-LR1	-716	-3961	4.67522	2.99907e+09	0.0541586	1.15674e+06	0.0561704	15.62	0.0567674	7.2	0.121509	-0.242234	0.125076
LR-sector_n@1.asc	27.07.2022	18:22:00	HD-LR1	-600	1310	4.65705	2.97979e+09	0.0407523	1.14916e+06	0.039119	15.32	0.0365384	7.07	0.162681	-0.215612	0.163987
LR-sector_n@2.asc	27.07.2022	18:25:00	HD-LR1	-600	1260	4.65363	2.97604e+09	0.0275494	1.14748e+06	0.035707	15.43	0.0566991	7.04	0.173111	-0.302668	0.174134
LR-sector_n@3.asc	27.07.2022	18:29:00	HD-LR1	-600	1210	4.64308	2.96383e+09	0.0308235	1.14289e+06	0.030534	15.42	0.0479241	7.02	0.18255	-0.317372	0.18326
LR-sector_n@4.asc	27.07.2022	18:33:00	HD-LR1	-600	1160	4.63072	2.96178e+09	0.0289234	1.14253e+06	0.0281275	15.34	0.0504637	7.07	0.123338	-0.226012	0.124229
LR-sector_n@5.asc	27.07.2022	18:36:00	HD-LR1	-600	1110	4.6317	2.96131e+09	0.0444103	1.14178e+06	0.0450795	15.44	0.0569913	6.89	0.153411	-0.457159	0.155246
LR-sector_c@1.asc	27.07.2022	18:47:00	HD-LR1	-635	-1434	4.60211	2.96285e+09	0.0270568	1.14204e+06	0.0237778	15.55	0.0696164	6.99	0.153983	-0.414823	0.154494
LR-sector_c@2.asc	27.07.2022	18:50:00	HD-LR1	-635	-1384	4.60523	2.96198e+09	0.0394041	1.14164e+06	0.0410394	15.74	0.0478418	7.01	0.142878	-0.493693	0.144512
LR-sector_c@3.asc	27.07.2022	18:54:00	HD-LR1	-635	-1334	4.60613	2.9472e+09	0.036766	1.13604e+06	0.0377685	15.66	0.0568996	7.07	0.132404	-0.392393	0.133897
LR-sector_c@4.asc	27.07.2022	18:57:00	HD-LR1	-635	-1284	4.59963	2.95503e+09	0.0323851	1.1391e+06	0.041709	15.67	0.0557535	7.13	0.196833	-0.337883	0.198061
LR-sector_c@5.asc	27.07.2022	19:01:00	HD-LR1	-635	-1234	4.59366	2.94584e+09	0.0449388	1.13583e+06	0.0501935	15.5	0.0573241	6.98	0.167061	-0.398779	0.16915
LR-sector_c@6.asc	27.07.2022	19:05:00	HD-LR1	-635	-1184	4.58728	2.95451e+09	0.0308614	1.1392e+06	0.0353011	15.83	0.0559675	7.23	0.161869	-0.321546	0.162939
LR-sector_n@6.asc	27.07.2022	19:09:00	HD-LR1	-605	1061	4.57586	2.94882e+09	0.0279286	1.13668e+06	0.0315687	15.56	0.0593203	6.92	0.122132	-0.489692	0.123265
WEK_KleineKyll_K1@1.asc	27.07.2022	19:24:00	natural corundum	-3177	842	4.5578	2.94761e+09	0.0372306	1.13294e+06	0.0403969	8.21	0.0538551	3.68	0.131997	0.115496	0.133709
WEK_KleineKyll_K1@2.asc	27.07.2022	19:28:00	natural corundum	-3259	810	4.5691	2.95329e+09	0.0250851	1.1357e+06	0.0312233	8.4	0.0587462	3.38	0.171314	-0.283604	0.172105
WEK_KleineKyll_K1@3.asc	27.07.2022	19:32:00	natural corundum	-3268	909	4.56805	2.9185e+09	0.0306535	1.12101e+06	0.0304684	8.04	0.042402	3.24	0.162052	-0.23492	0.162848
WEK_KleineKyll_K1@4.asc	27.07.2022	19:36:00	natural corundum	-3210	907	4.57109	2.94028e+09	0.064887	1.13009e+06	0.0699166	8.2	0.0564541	3.45	0.147722	-0.108957	0.152265
WEK_KleineKyll_K1@5.asc	27.07.2022	19:41:00	natural corundum	-3159	892	4.55517	2.93524e+09	0.0386774	1.12784e+06	0.0416298	7.99	0.045988	3.49	0.12848	0.0409823	0.130347
WEK_Alfbach_K1@1.asc	27.07.2022	19:59:00	natural corundum	-2496	-1311	4.54788	2.92068e+09	0.0416108	1.1198e+06	0.0463796	4.69	0.0442836	1.54	0.207349	-0.177003	0.20879
WEK_Alfbach_K1@2.asc	27.07.2022	20:03:00	natural corundum	-2460	-1352	4.55036	2.91839e+09	0.0093909	1.11937e+06	0.0194185	4.75	0.0566215	1.79	0.146505	0.0416023	0.146863
WEK_Alfbach_K1@3.asc	27.07.2022	20:06:00	natural corundum	-2528	-1359	4.53594	2.93519e+09	0.0315946	1.12621e+06	0.0342304	5.02	0.0572554	1.74	0.207333	-0.150287	0.208119
WEK_Alfbach_K1@4.asc	27.07.2022	20:10:00	natural corundum	-2493	-1400	4.53914	2.94225e+09	0.0424011	1.12861e+06	0.0467156	5.25	0.0589097	1.88	0.159064	-0.131051	0.160965
WEK_Alfbach_K1@5.asc	27.07.2022	20:14:00	natural corundum	-2444	-1408	4.52937	2.93407e+09	0.192952	1.12606e+06	0.204588	4.98	0.174066	1.94	0.217332	0.070802	0.242697
WEK_LR@20.asc	27.07.2022	20:19:00	HD-LR1	-1133	-491	4.52047	2.91407e+09	0.0543367	1.12371e+06	0.060989	16.1	0.0608559	7.31	0.162082	-0.382268	0.16525
WEK_LR@21.asc	27.07.2022	20:22:00	HD-LR1	-1225	-398	4.53219	2.8725e+09	0.108081	1.10781e+06	0.115918	15.13	0.0543402	7.09	0.157664	-0.0968927	0.169127
WEK_LR@22.asc	27.07.2022	20:26:00	HD-LR1	-1199	-548	4.52348	2.90101e+09	0.0318422	1.11842e+06	0.0330945	15.71	0.0530422	7.01	0.112909	-0.478098	0.114253
WEK_LR@23.asc	27.07.2022	20:30:00	HD-LR1	-1248	-590	4.52333	2.87686e+09	0.0388141	1.10894e+06	0.0409454	15.43	0.0611691	6.96	0.191573	-0.382287	0.192789
S2_2_LR_c@1.asc	28.07.2022	16:17:00	HD-LR1	-1066	-1527	4.8813	2.6087e+09	0.0401281	1.00537e+06	0.0396094	15.0244	0.0494244	6.38201	0.169077	-0.565091	0.171079
S2_2_LR_c@2.asc	28.07.2022	16:21:00	HD-LR1	-1010	-1527	4.88637	2.60757e+09	0.063113	1.00575e+06	0.0680682	15.0621	0.0687679	6.70394	0.162582	-0.264544	0.166587		28.07.2022
S2_2_LR_ne@1.asc	28.07.2022	16:27:00	HD-LR1	3321	3091	4.88156	2.5824e+09	0.0536205	995296	0.0575596	15.13	0.0499947	6.59493	0.188578	-0.408255	0.190416		Avg Natural	1SD
S2_2_LR_ne@2.asc	28.07.2022	16:30:00	HD-LR1	3330	3030	4.87518	2.57807e+09	0.0637977	993928	0.0617624	14.7699	0.0502581	6.52805	0.226659	-0.287446	0.228207		-0.0480751	0.161253
S2_2_LR_nw@1.asc	28.07.2022	16:36:00	HD-LR1	-2926	2748	4.85622	2.59993e+09	0.0603475	1.00231e+06	0.0616328	15.1225	0.0657657	6.68094	0.223992	-0.318832	0.226668
S2_2_LR_nw@2.asc	28.07.2022	16:43:00	HD-LR1	-2873	2722	5.10984	2.75209e+09	0.0715553	1.06111e+06	0.0719171	15.0784	0.0677696	6.82609	0.201718	-0.151599	0.204867		Avg HD-LR1
S2_2_Br_K1@1.asc	28.07.2022	16:52:00	natural corundum	-3019	1522	5.16248	2.76578e+09	0.0393442	1.06195e+06	0.045169	5.97036	0.0434744	2.54713	0.172139	0.344387	0.173662		(excl. Sector)	1SD	N
S2_2_Br_K1@2.asc	28.07.2022	16:56:00	natural corundum	-2969	1522	5.15482	2.76896e+09	0.0641047	1.06292e+06	0.0686272	6.04513	0.0506116	2.10309	0.146784	-0.138289	0.149196		-0.325707	0.188286	28
S2_2_Br_K1@3.asc	28.07.2022	16:59:00	natural corundum	-2969	1472	5.16297	2.78005e+09	0.0559901	1.06735e+06	0.0520974	6.21912	0.0578572	2.23998	0.144108	-0.0928713	0.14731
S2_2_Br_K1@4.asc	28.07.2022	17:03:00	natural corundum	-3019	1472	5.16474	2.77069e+09	0.0415771	1.06383e+06	0.0378897	6.09903	0.0565598	2.22004	0.179183	-0.0497626	0.181655
S2_2_Br_K2@1.asc	28.07.2022	17:09:00	natural corundum	-2250	1792	5.14378	2.76034e+09	0.0495126	1.06227e+06	0.0479975	10.8345	0.0588845	4.66985	0.111742	-0.0854337	0.115987
S2_2_Br_K2@2.asc	28.07.2022	17:12:00	natural corundum	-2250	1742	5.14142	2.76161e+09	0.0461777	1.06296e+06	0.0473737	10.8287	0.0755498	4.84084	0.124165	0.0879419	0.130415
S2_2_Br_K2@3.asc	28.07.2022	17:16:00	natural corundum	-2200	1792	5.15002	2.74849e+09	0.0490678	1.05755e+06	0.0495713	10.7481	0.0504039	4.88477	0.201319	0.173839	0.20307
S2_2_Br_K2@4.asc	28.07.2022	17:19:00	natural corundum	-2213	1850	5.14224	2.75587e+09	0.0689765	1.06013e+06	0.0718223	10.9252	0.0398103	4.59847	0.14249	-0.203878	0.144032
S2_2_Br_K3@1.asc	28.07.2022	17:25:00	natural corundum	-1607	1625	5.14637	2.77973e+09	0.0453175	1.06726e+06	0.0473341	7.51476	0.078207	3.02785	0.162445	0.0142333	0.167612
S2_2_Br_K3@2.asc	28.07.2022	17:29:00	natural corundum	-1557	1625	5.13609	2.78031e+09	0.0544923	1.06816e+06	0.0544041	7.39108	0.0450258	2.99286	0.190176	0.0441416	0.191656
S2_2_Br_K3@3.asc	28.07.2022	17:33:00	natural corundum	-1507	1625	5.13503	2.84254e+09	0.0492181	1.09211e+06	0.044952	7.72145	0.0467273	3.23407	0.161498	0.111694	0.163372
S2_2_Br_K3@4.asc	28.07.2022	17:36:00	natural corundum	-1457	1575	5.13766	2.78474e+09	0.036998	1.06966e+06	0.0350118	7.43701	0.0496756	2.92769	0.133188	-0.0449753	0.135746
S2_2_LR_n@1.asc	28.07.2022	17:48:00	HD-LR1	-1194	2958	5.12358	2.73806e+09	0.0395359	1.05509e+06	0.0412855	15.0865	0.0573707	6.88672	0.161097	-0.0955328	0.16392
S2_2_LR_n@2.asc	28.07.2022	17:52:00	HD-LR1	-1112	3088	5.12283	2.71915e+09	0.0528421	1.04788e+06	0.0555248	14.9681	0.0542084	6.50999	0.15521	-0.408532	0.157827
S2_2_LR_nw@3.asc	28.07.2022	17:55:00	HD-LR1	-3014	2765	5.09959	2.69385e+09	0.0536533	1.0384e+06	0.0499229	15.0878	0.04045	6.71963	0.147559	-0.262309	0.149096
S2_2_LR_nw@4.asc	28.07.2022	17:59:00	HD-LR1	-2806	2658	5.11836	2.70674e+09	0.0495856	1.04349e+06	0.0470033	15.0072	0.045761	6.51232	0.154039	-0.426516	0.155923
S2_2_Br_K5@1.asc	28.07.2022	18:22:00	natural corundum	-1489	649	5.06132	2.68705e+09	0.0501543	1.03257e+06	0.0577049	8.05851	0.0733041	3.28648	0.228265	-0.012591	0.231523
S2_2_Br_K5@2.asc	28.07.2022	18:26:00	natural corundum	-1439	649	5.06602	2.68385e+09	0.0438257	1.03125e+06	0.0451235	8.00001	0.0637387	3.37265	0.13449	0.104016	0.138637
S2_2_Br_K5@3.asc	28.07.2022	18:29:00	natural corundum	-1389	649	5.06147	2.68612e+09	0.0522477	1.03161e+06	0.0515595	8.00653	0.0586472	3.0324	0.150825	-0.238883	0.153971
S2_2_Br_K5@4.asc	28.07.2022	18:33:00	natural corundum	-1389	699	5.05877	2.67509e+09	0.0434136	1.02758e+06	0.0466908	7.95303	0.0593319	3.06378	0.126786	-0.179538	0.130599
S2_2_Br_K6@1.asc	28.07.2022	18:39:00	natural corundum	2133	310	5.0484	2.72313e+09	0.0286026	1.04779e+06	0.0386005	9.85882	0.0534418	4.09031	0.163157	-0.153087	0.165579
S2_2_Br_K6@2.asc	28.07.2022	18:43:00	natural corundum	2033	260	5.03316	2.69686e+09	0.0428473	1.03728e+06	0.0403494	10.0472	0.0560998	4.44365	0.12012	0.100604	0.123718
S2_2_Br_K6@3.asc	28.07.2022	18:46:00	natural corundum	2083	260	5.01675	2.69914e+09	0.0391613	1.03805e+06	0.0445702	9.89285	0.0558077	4.28989	0.179413	0.0280648	0.181817
S2_2_Br_K6@4.asc	28.07.2022	18:50:00	natural corundum	2133	260	5.01348	2.70048e+09	0.0588031	1.03787e+06	0.0613411	9.9959	0.0465209	3.95656	0.114165	-0.358085	0.116778
S2_2_Br_K7@1.asc	28.07.2022	18:57:00	natural corundum	-105	-747	4.9932	2.65462e+09	0.0417485	1.01963e+06	0.0444103	7.82299	0.0624906	3.03751	0.157584	-0.137637	0.161001
S2_2_Br_K7@2.asc	28.07.2022	19:01:00	natural corundum	-55	-747	5.00263	2.65472e+09	0.0465035	1.01962e+06	0.0435818	7.69799	0.0689065	3.14666	0.213265	0.0367772	0.216346
S2_2_Br_K7@3.asc	28.07.2022	19:04:00	natural corundum	-55	-797	5.00578	2.6596e+09	0.0395818	1.02139e+06	0.0461804	7.93205	0.0402913	2.88543	0.170445	-0.34654	0.171767
S2_2_Br_K7@4.asc	28.07.2022	19:08:00	natural corundum	-55	-847	5.0021	2.66259e+09	0.0466771	1.02252e+06	0.050387	7.73876	0.0614836	3.23049	0.119348	0.0990622	0.123685
S2_2_LR_c@3.asc	28.07.2022	19:14:00	HD-LR1	-1152	-1488	4.99012	2.65343e+09	0.0359591	1.02303e+06	0.0433572	15.2835	0.052474	6.60939	0.180685	-0.473722	0.182797
S2_2_LR_c@4.asc	28.07.2022	19:17:00	HD-LR1	-1149	-1556	4.98659	2.65251e+09	0.0421474	1.02193e+06	0.0427618	15.2571	0.0562956	6.44907	0.170632	-0.61941	0.173201
S2_2_LR_c@5.asc	28.07.2022	19:21:00	HD-LR1	-1099	-1603	4.98198	2.65329e+09	0.0537512	1.02291e+06	0.0580496	15.0742	0.055321	6.54137	0.185437	-0.432481	0.187724
S2_2_LR_c@6.asc	28.07.2022	19:25:00	HD-LR1	-980	-1629	4.98832	2.65859e+09	0.0284954	1.0251e+06	0.0281006	15.3307	0.0643335	7.05496	0.121639	-0.0552939	0.126292
S2_2_Br_K1@5.asc	28.07.2022	19:47:00	natural corundum	-3094	1529	4.95693	2.64565e+09	0.0253041	1.01555e+06	0.0235147	5.98365	0.0567007	2.14092	0.161592	-0.0682362	0.164342
S2_2_Br_K1@6.asc	28.07.2022	19:51:00	natural corundum	-3091	1478	4.96038	2.64795e+09	0.025206	1.01592e+06	0.0340152	6.05842	0.0485269	2.16354	0.196562	-0.084884	0.198225
S2_2_Br_K1@7.asc	28.07.2022	19:55:00	natural corundum	-3018	1418	4.95396	2.66528e+09	0.0300764	1.02273e+06	0.0433054	6.03893	0.0324279	2.24139	0.215186	0.00310106	0.215866
S2_2_Br_K1@8.asc	28.07.2022	19:58:00	natural corundum	-2959	1435	4.95043	2.65761e+09	0.0281118	1.02039e+06	0.0310955	6.04323	0.0551013	1.94093	0.160511	-0.299274	0.163127
S2_2_LR_nw@5.asc	28.07.2022	20:04:00	HD-LR1	-3012	2695	4.94026	2.608e+09	0.0363165	1.00479e+06	0.0470928	15.1582	0.0481781	6.59769	0.207634	-0.42021	0.209186
S2_2_LR_nw@6.asc	28.07.2022	20:08:00	HD-LR1	-3032	2825	4.93462	2.59637e+09	0.0367669	1.00092e+06	0.045596	15.0983	0.0526968	6.51833	0.186531	-0.467944	0.188594
S2_2_LR_nw@7.asc	28.07.2022	20:11:00	HD-LR1	-2943	2664	4.94228	2.60415e+09	0.0436157	1.00414e+06	0.0515527	15.0402	0.0517515	6.80438	0.178562	-0.153285	0.180641
S2_2_LR_nw@8.asc	28.07.2022	20:15:00	HD-LR1	-2951	2813	4.93203	2.59124e+09	0.0440127	998886	0.0432381	14.9676	0.0449035	6.54754	0.180596	-0.370912	0.182145
S2_2_LR_nw@9.asc	28.07.2022	20:24:00	HD-LR1	-3064	2707	4.91525	2.59938e+09	0.0394183	1.00191e+06	0.0472713	15.2683	0.0519805	6.41372	0.140211	-0.660409	0.142872
S2_2_LR_nw@10.asc	28.07.2022	20:30:00	HD-LR1	-3091	2740	4.92388	2.5888e+09	0.0379001	998195	0.0410339	15.2506	0.0519709	6.62132	0.201078	-0.444729	0.202942
S2_2_LR_c@7.asc	28.07.2022	21:24:00	HD-LR1	-1094	-1440	4.89238	2.59268e+09	0.0409079	998940	0.0465892	14.9976	0.0528329	6.68126	0.178817	-0.253535	0.180979
S2_2_LR_c@8.asc	28.07.2022	21:28:00	HD-LR1	-1162	-1436	4.89456	2.59044e+09	0.0422477	998164	0.0447285	15.1481	0.0439482	6.86706	0.140094	-0.147135	0.142003
S2_2_LR_c@9.asc	28.07.2022	21:32:00	HD-LR1	-1358	-1506	4.88603	2.59042e+09	0.0240129	998283	0.0278445	15.3364	0.0518588	6.59466	0.12299	-0.515895	0.126002
S2_2_LR_c@10.asc	28.07.2022	21:35:00	HD-LR1	-1263	-1558	4.88682	2.58837e+09	0.0271611	998003	0.0304613	15.3983	0.0645623	6.58226	0.15608	-0.560425	0.159759
HK1_CSK-06_K6@1.asc	29.07.2022	10:31:00	natural corundum	671	-1370	5.35418	3.13798e+09	0.0489598	1.20543e+06	0.0529026	6.77267	0.0568495	2.58026	0.165127	-0.116517	0.167833
HK1_CSK-06_K6@2.asc	29.07.2022	10:35:00	natural corundum	671	-1420	5.35643	3.12185e+09	0.0408277	1.19832e+06	0.0438809	6.68225	0.0495352	2.74301	0.159507	0.0933641	0.161637		29.07.2022
HK1_CSK-06_K6@3.asc	29.07.2022	10:38:00	natural corundum	671	-1470	5.32684	3.05355e+09	0.114381	1.17231e+06	0.118984	6.522	0.0583596	2.5758	0.159237	0.0105021	0.162191		Avg Natural	1SD
HK1_CSK-06_K6@4.asc	29.07.2022	10:42:00	natural corundum	671	-1520	5.28561	3.0358e+09	0.04041	1.16401e+06	0.042003	4.87904	0.050122	1.73778	0.138552	0.0361291	0.141057		-0.0502146	0.162972
HK1_CSK-06_K6@5.asc	29.07.2022	10:46:00	natural corundum	671	-1570	5.25426	2.9873e+09	0.0447569	1.14565e+06	0.0421535	4.84732	0.0562411	1.99586	0.14495	0.310615	0.14796
HK1_CSK-06_K3@1.asc	29.07.2022	11:14:00	natural corundum	1861	-2722	4.96797	2.85484e+09	0.0366334	1.09537e+06	0.0390245	6.45442	0.0647059	2.44359	0.164821	-0.0860388	0.168324		Avg HD-LR1
HK1_CSK-06_K6@6.asc	29.07.2022	11:19:00	natural corundum	633	-1567	4.93549	2.83001e+09	0.0465536	1.08629e+06	0.0526356	4.95398	0.0424104	1.97857	0.155105	0.237315	0.156713		(excl. Sector)	1SD	N
HK1_CSK-06_K6@7.asc	29.07.2022	11:23:00	natural corundum	583	-1550	4.91622	2.81633e+09	0.0591508	1.07976e+06	0.0604516	4.847	0.0571687	1.48261	0.158169	-0.202013	0.161024		-0.349734	0.140709	36
HK1_CSK-06_K6@8.asc	29.07.2022	11:27:00	natural corundum	836	-1560	4.89745	2.76703e+09	0.0396386	1.06172e+06	0.0444303	4.88401	0.0595135	1.90936	0.153724	0.204939	0.156903
HK1_LR_c@1.asc	29.07.2022	11:37:00	HD-LR1	680	-259	5.00293	2.72902e+09	0.062891	1.05211e+06	0.0666962	15.159	0.0527851	6.87713	0.168339	-0.216147	0.170631
HK1_LR_c@2.asc	29.07.2022	11:40:00	HD-LR1	739	-241	5.00691	2.70507e+09	0.0757015	1.04265e+06	0.0821241	15.1047	0.0750997	6.9849	0.135387	-0.0807633	0.141074
HK1_LR_c@3.asc	29.07.2022	11:44:00	HD-LR1	450	-167	5.00113	2.72166e+09	0.0723309	1.04977e+06	0.0798577	15.2022	0.0627918	6.98053	0.194385	-0.135825	0.197192
HK1_LR_c@4.asc	29.07.2022	11:48:00	HD-LR1	377	-152	4.99433	2.7082e+09	0.064703	1.04445e+06	0.0688053	15.3934	0.0532205	6.85325	0.18532	-0.361769	0.187438
HK1_LR_c@5.asc	29.07.2022	11:51:00	HD-LR1	314	-196	4.97893	2.71015e+09	0.0662233	1.04458e+06	0.0701129	15.2307	0.0542083	6.70362	0.132167	-0.425908	0.13523
HK1_LR_c@6.asc	29.07.2022	11:58:00	HD-LR1	336	-273	4.93688	2.68046e+09	0.0585631	1.03346e+06	0.057925	15.3331	0.0430567	6.7465	0.155676	-0.43655	0.157327
HK1_LR_c@7.asc	29.07.2022	12:02:00	HD-LR1	494	-186	4.92381	2.67968e+09	0.0752674	1.03296e+06	0.0817936	15.157	0.0474016	6.57324	0.197606	-0.517231	0.199185
HK1_LR_c@8.asc	29.07.2022	12:05:00	HD-LR1	680	-379	4.91671	2.66812e+09	0.0769905	1.02872e+06	0.0770596	14.904	0.0507072	6.82559	0.175349	-0.134723	0.177381
S2_2_LR_c@11.asc	29.07.2022	14:15:00	HD-LR1	-1391	-1504	4.93361	2.63336e+09	0.0253543	1.01563e+06	0.0295294	15.2026	0.0577362	6.87486	0.15732	-0.241047	0.160246
S2_2_LR_c@12.asc	29.07.2022	14:18:00	HD-LR1	-1082	-1676	4.93267	2.63912e+09	0.0419248	1.01721e+06	0.0421602	15.3546	0.0497956	6.77314	0.18478	-0.421245	0.186641
S2_2_LR_c@13.asc	29.07.2022	14:22:00	HD-LR1	-1014	-1704	4.92441	2.64111e+09	0.0377192	1.01799e+06	0.0391119	15.3855	0.0505539	6.70863	0.160192	-0.50143	0.162401
S2_2_LR_c@14.asc	29.07.2022	14:25:00	HD-LR1	-933	-1713	4.92028	2.63168e+09	0.0503918	1.01446e+06	0.0533737	15.1446	0.0525373	6.83674	0.164894	-0.248785	0.167211
S2_2_LR_c@15.asc	29.07.2022	14:29:00	HD-LR1	-934	-1635	4.9083	2.58535e+09	0.201903	996241	0.197358	15.2937	0.100323	6.81628	0.15637	-0.346652	0.165099
S2_2_LR_c@16.asc	29.07.2022	14:33:00	HD-LR1	-911	-1584	4.7988	2.55679e+09	0.0446911	985602	0.0388545	15.0837	0.0644282	6.76027	0.194967	-0.293128	0.197913
S2_2_LR_c@17.asc	29.07.2022	14:36:00	HD-LR1	-919	-1493	4.79445	2.54914e+09	0.0486665	982008	0.0456675	15.0186	0.0583661	6.5861	0.155338	-0.432466	0.158365
S2_2_LR_c@18.asc	29.07.2022	14:40:00	HD-LR1	-959	-1442	4.79197	2.54583e+09	0.0506021	981217	0.0527256	15.181	0.0597999	6.59379	0.155019	-0.509282	0.158202
S2_2_LR_c@19.asc	29.07.2022	14:44:00	HD-LR1	-1005	-1391	4.78277	2.54102e+09	0.0525977	979710	0.060078	15.0894	0.0484558	6.78931	0.185463	-0.267206	0.18722
S2_2_LR_c@20.asc	29.07.2022	14:47:00	HD-LR1	-1072	-1373	4.7822	2.53525e+09	0.041877	977573	0.0463069	15.2163	0.050341	6.62551	0.169121	-0.496074	0.171197
S2_2_LR_n@3.asc	29.07.2022	16:52:00	HD-LR1	-1096	3159	5.02272	2.65231e+09	0.0320032	1.02302e+06	0.0342882	14.9796	0.052572	6.81847	0.124667	-0.181136	0.12772
S2_2_LR_n@4.asc	29.07.2022	16:56:00	HD-LR1	-1237	3035	5.02741	2.66437e+09	0.0352599	1.02694e+06	0.0350678	15.2177	0.0614387	6.37705	0.186655	-0.743889	0.189453
S2_2_LR_n@5.asc	29.07.2022	17:00:00	HD-LR1	-1199	3076	5.01281	2.65899e+09	0.0409486	1.02498e+06	0.0466056	15.2609	0.059012	6.78077	0.189015	-0.364939	0.191566
HK1_LR_c@9.asc	29.07.2022	17:09:00	HD-LR1	-1083	317	5.01626	2.62215e+09	0.0462229	1.01044e+06	0.0546623	15.025	0.0698673	6.62861	0.172133	-0.393474	0.176042
HK1_LR_c@10.asc	29.07.2022	17:13:00	HD-LR1	-1083	367	5.03038	2.61566e+09	0.0380273	1.0085e+06	0.0428693	14.9565	0.0471354	6.75626	0.138698	-0.230968	0.140913
HK1_LR_c@11.asc	29.07.2022	17:17:00	HD-LR1	-1033	367	5.03106	2.61184e+09	0.0446946	1.00676e+06	0.0531075	14.9032	0.0556262	6.5095	0.189913	-0.448569	0.19217
HK1_LR_c@12.asc	29.07.2022	17:20:00	HD-LR1	-983	367	5.02929	2.60735e+09	0.036594	1.00518e+06	0.0379227	14.8841	0.0530117	6.51465	0.105609	-0.433483	0.109256
HK1_CSK-16_K1@1.asc	29.07.2022	17:27:00	natural corundum	-3445	475	5.01179	2.70096e+09	0.0370387	1.03416e+06	0.0390528	1.24772	0.053532	-0.402399	0.182647	-0.192996	0.184821
HK1_CSK-16_K1@2.asc	29.07.2022	17:31:00	natural corundum	-3445	425	5.01209	2.70779e+09	0.0615747	1.03693e+06	0.0617748	1.36264	0.0441425	-0.119883	0.133996	0.0292419	0.136008
HK1_CSK-16_K1@3.asc	29.07.2022	17:35:00	natural corundum	-3395	425	5.01825	2.70367e+09	0.0368397	1.03489e+06	0.0404046	1.22282	0.0437366	-0.206847	0.139998	0.0159185	0.14189
HK1_CSK-16_K1@4.asc	29.07.2022	17:39:00	natural corundum	-3395	475	5.01314	2.6995e+09	0.0336375	1.0331e+06	0.0381249	1.36753	0.0597309	-0.306312	0.186012	-0.159967	0.188667
HK1_CSK-16_K1@5.asc	29.07.2022	17:42:00	natural corundum	-3345	475	5.01202	2.69723e+09	0.0363606	1.0324e+06	0.040241	1.33932	0.0499051	-0.136006	0.175607	0.0253977	0.177573
HK1_CSK-04_K7@1.asc	29.07.2022	17:49:00	natural corundum	1850	1778	4.98629	2.71463e+09	0.0319897	1.03973e+06	0.034196	2.10395	0.059291	0.0043961	0.184908	-0.2371	0.187539
HK1_CSK-04_K7@2.asc	29.07.2022	17:53:00	natural corundum	1900	1778	4.99459	2.70367e+09	0.0311424	1.03557e+06	0.0362498	2.13697	0.0666231	0.111225	0.162037	-0.147577	0.165812
HK1_CSK-04_K7@3.asc	29.07.2022	17:56:00	natural corundum	1900	1728	4.97777	2.70793e+09	0.0279363	1.03725e+06	0.0340175	2.17936	0.0544182	0.0936264	0.188491	-0.187523	0.190668
HK1_CSK-04_K7@4.asc	29.07.2022	18:00:00	natural corundum	1900	1678	4.97402	2.71001e+09	0.0523864	1.03809e+06	0.053806	2.19975	0.0541521	0.0896263	0.123179	-0.202272	0.126454
HK1_CSK-04_K7@5.asc	29.07.2022	18:03:00	natural corundum	1850	1678	4.9783	2.71194e+09	0.0395465	1.03817e+06	0.0479608	2.12571	0.0550975	0.154136	0.144815	-0.0987037	0.147708
HK1_CSK-06_K8@1.asc	29.07.2022	18:10:00	natural corundum	1318	-3306	4.95175	2.80121e+09	0.0280531	1.07409e+06	0.0328618	4.90292	0.0542702	1.56149	0.137531	-0.152566	0.140484
HK1_CSK-06_K8@2.asc	29.07.2022	18:13:00	natural corundum	1368	-3306	4.95869	2.79974e+09	0.029485	1.0733e+06	0.0325772	5.20994	0.0505408	1.60898	0.183403	-0.266406	0.185334
HK1_CSK-06_K8@3.asc	29.07.2022	18:17:00	natural corundum	1418	-3306	4.9602	2.78362e+09	0.0360422	1.06782e+06	0.0435829	5.2209	0.0590141	1.87809	0.208958	-0.00328655	0.211269
HK1_CSK-06_K8@4.asc	29.07.2022	18:21:00	natural corundum	1378	-3192	4.96106	2.84538e+09	0.0386353	1.09237e+06	0.0446096	6.41293	0.0503209	2.64445	0.2083	0.136263	0.209988
HK1_CSK-06_K8@5.asc	29.07.2022	18:24:00	natural corundum	1428	-3192	4.95851	2.76747e+09	0.0186966	1.0619e+06	0.0239137	6.20224	0.0400558	2.14501	0.182369	-0.251871	0.183591
HK1_LR@13.asc	29.07.2022	18:34:00	HD-LR1	-1226	298	4.92903	2.58489e+09	0.0446405	996489	0.0450891	15.1049	0.0487247	6.85154	0.115816	-0.213416	0.118639
HK1_LR@14.asc	29.07.2022	18:38:00	HD-LR1	-1226	248	4.93245	2.58936e+09	0.0445886	998294	0.0504609	15.0886	0.0406669	6.72509	0.217994	-0.330683	0.219048
HK1_LR@15.asc	29.07.2022	18:41:00	HD-LR1	-1176	248	4.94059	2.58996e+09	0.041691	998338	0.0522428	15.1143	0.0674806	6.54937	0.181125	-0.518748	0.184597
HK1_LR@16.asc	29.07.2022	18:45:00	HD-LR1	-1126	248	4.9418	2.58624e+09	0.0422644	996979	0.0481217	15.0288	0.0464508	6.51075	0.134365	-0.512668	0.136585
HK1_LR@17.asc	29.07.2022	18:49:00	HD-LR1	-1165	337	4.92234	2.57734e+09	0.0355592	993173	0.0422429	15.0508	0.0503999	6.60855	0.179192	-0.426882	0.181157
S2_2_LR_c@100.asc	29.07.2022	20:22:00	HD-LR1	-1106	-1473	4.84597	2.54862e+09	0.0351896	982544	0.0402068	15.032	0.0845044	6.71812	0.207954	-0.308131	0.212687
S2_2_LR_c@101.asc	29.07.2022	20:26:00	HD-LR1	-963	-1516	4.83977	2.55233e+09	0.0284188	984321	0.035472	14.975	0.050024	6.67192	0.198317	-0.324425	0.200068
S2_2_LR_c@102.asc	29.07.2022	20:32:00	HD-LR1	-1046	-1648	4.83226	2.55875e+09	0.032514	986356	0.0376308	15.2048	0.0347971	6.8583	0.156808	-0.258687	0.15788
S2_2_LR_c@103.asc	29.07.2022	20:36:00	HD-LR1	-978	-1680	4.83196	2.56224e+09	0.0315498	987928	0.0380642	15.2122	0.0503355	6.91493	0.16364	-0.206253	0.165784
S2_2_LR_c@104.asc	29.07.2022	20:40:00	HD-LR1	-978	-1750	4.82756	2.56282e+09	0.0275787	987996	0.0285964	15.2857	0.0534346	6.73319	0.159968	-0.425129	0.162437
S2_2_LR_c@105.asc	29.07.2022	20:44:00	HD-LR1	-912	-1757	4.81987	2.54923e+09	0.0195062	982803	0.024911	15.2056	0.0637455	6.91501	0.169074	-0.202709	0.172391
Δ'17O expressed relative to a slope of 0.528 and calculated using δ'18O and δ'17O; δ values include smoothing of FC baselines

## Sheet: Part F
Supplementary Table 1 Part F: Summary of ANOVA statistical tests for homogeneity (one-way)
Test parameter	Data used	Remarks	Factor	Replicates	Count factor	Count replicates	Sum of squares between-factor	Sum of squares within-factor	Total corrected sum of squares	F-factor	P Probability for accepting null-hypotheses
d18O	LF-IRMS	slice	Position from Centre	Lab averages	7	2	0.720636	0.894637	1.61527	0.939757	0.522084
d18O	SIMS	slice	Position from Centre	SIMS replicates	19	4	0.511124	0.857346	1.36847	1.88787	0.0359878
d18O	SIMS	slice, -5689 µm omitted	Position from Centre	SIMS replicates	18	4	0.337952	0.841292	1.17924	1.27601	0.243218
D'17O	SIMS	slice	Position from Centre	SIMS replicates	3	5 (6)	0.0298041	0.141073	0.170877	1.58451	0.237519
d18O	SIMS	orientation	Oriented fragment	SIMS replicates	4	6	0.0747125	0.714383	0.789096	0.697221	0.564624
